# Supplementary material
Source: publisher figshare collection journal article supplement (https://tandf.figshare.com/articles/dataset/_/3408067)
Supplement: Supplementary file 1 [file 1]

## Supplement B: Model Selection Results and Projections Based on Alternative Sea Surface Temperatures

Table S.B.1. Stepwise model selection results for the right whale distribution off North Carolina. Predictor variables include the distance to the shoreline, mean winter sea surface temperature (SST), bathymetric depth, and bathymetric slope. Survey effort (the number of flights) was included as an offset in all candidate models. Smoothed covariates are denoted by  $s(\cdot)$ . The evaluation criteria included the proportion of deviance explained, generalized cross-validation score (GCV), and mean average squared prediction error (ASPE) from a fivefold cross validation. The best model at each step is indicated by bold italic type.

| Step            | Model                                                                                              | % Deviance         | GCV                  | Mean ASPE             |
|-----------------|----------------------------------------------------------------------------------------------------|--------------------|----------------------|-----------------------|
| <b><i>1</i></b> | <b><i>Null</i></b>                                                                                 | <b><i>0.0</i></b>  | <b><i>0.3003</i></b> | <b><i>0.03032</i></b> |
| 2               | $s(\log[\text{depth}])$                                                                            | 1.84               | 0.2962               | 0.03031               |
| <b><i>2</i></b> | <b><i><math>s(\text{distance to shore})</math></i></b>                                             | <b><i>3.74</i></b> | <b><i>0.2904</i></b> | <b><i>0.03031</i></b> |
| 2               | $s(\log[\text{slope}])$                                                                            | 3.61               | 0.2920               | 0.03029               |
| 2               | $s(\text{avg SST})$                                                                                | 2.93               | 0.2940               | 0.03031               |
| 3               | $s(\text{distance to shore}) + s(\log[\text{depth}])$                                              | 4.38               | 0.2907               | 0.03030               |
| <b><i>3</i></b> | <b><i><math>s(\text{distance to shore}) + s(\log[\text{slope}])</math></i></b>                     | <b><i>6.88</i></b> | <b><i>0.2844</i></b> | <b><i>0.03028</i></b> |
| 3               | $s(\text{distance to shore}) + s(\text{avg SST})$                                                  | 5.17               | 0.2885               | 0.03031               |
| 4               | $s(\text{distance to shore}) + s(\log[\text{slope}]) + s(\log[\text{depth}])$                      | 8.05               | 0.2817               | 0.03027               |
| <b><i>4</i></b> | <b><i><math>s(\text{distance to shore}) + s(\log[\text{slope}]) + s(\text{avg SST})</math></i></b> | <b><i>8.42</i></b> | <b><i>0.2812</i></b> | <b><i>0.03028</i></b> |
| 5               | $s(\text{distance to shore}) + s(\log[\text{slope}]) + s(\text{avg SST}) + s(\log[\text{depth}])$  | 9.11               | 0.2800               | 0.03027               |

Table S.B.2. Results of analysis of deviance tests comparing North Carolina right whale distribution models at each step of the stepwise selection procedure. Each model shown is the best model for that step from Table S.B.1. The reductions in deviance,  $F$ -statistics, and  $P$ -values compare each model with the one in the previous step.

| Model/step | Estimated df | Residual deviance | Reduction in deviance | $F$  | $P$    |
|------------|--------------|-------------------|-----------------------|------|--------|
| Null       | 1.00         | 186.3             |                       |      |        |
| Step 2     | 2.00         | 179.3             | 6.96                  | 24.1 | <0.001 |
| Step 3     | 4.67         | 173.5             | 5.86                  | 7.8  | <0.001 |
| Step 4     | 5.89         | 170.6             | 2.87                  | 8.5  | <0.01  |
| Step 5     | 6.57         | 169.3             | 1.28                  | 6.8  | <0.05  |



| Alt7c |     |      |      | Alt8a |      |      |      | Alt8b |     |      |      | Alt9a |     |      |      | Alt9b |     |      |      | Alt10 |     |      |      | Alt11 |      |      |      | Alt12 |      |      |      |
|-------|-----|------|------|-------|------|------|------|-------|-----|------|------|-------|-----|------|------|-------|-----|------|------|-------|-----|------|------|-------|------|------|------|-------|------|------|------|
| S1    | S2  | S3   | S4   | S1    | S2   | S3   | S4   | S1    | S2  | S3   | S4   | S1    | S2  | S3   | S4   | S1    | S2  | S3   | S4   | S1    | S2  | S3   | S4   | S1    | S2   | S3   | S4   | S1    | S2   | S3   | S4   |
| 10/2  | 9/6 | 10/1 | 10/2 | 12/1  | 10/2 | 12/1 | 12/1 | 10/2  | 9/6 | 10/1 | 10/2 | 10/3  | 9/2 | 10/1 | 10/2 | 10/1  | 8/2 | 10/7 | 10/1 | 10/2  | 9/6 | 10/1 | 10/1 | 12/2  | 12/1 | 12/1 | 12/2 | 12/2  | 12/1 | 12/1 | 12/2 |
| 3     | 6   | 6    | 0    | 2     | 7    | 12/1 | 1    | 3     | 9/6 | 6    | 0    | 1     | 0   | 5    | 7    | 4     | 3   | 10/7 | 1    | 3     | 9/6 | 6    | 9    | 8     | 8    | 3    | 7    | 3     | 0    | 1    | 2    |
| 100   | 100 | 100  | 100  | 100   | 100  | 100  | 100  | 100   | 100 | 100  | 100  | 100   | 100 | 100  | 100  | 100   | 100 | 100  | 100  | 100   | 100 | 100  | 100  | 100   | 100  | 100  | 100  | 100   | 100  | 100  | 100  |
| 48    | 48  | 48   | 48   | 7     | 6    | 7    | 7    | 48    | 48  | 48   | 48   | 26    | 26  | 26   | 26   | 54    | 54  | 54   | 54   | 6     | 6   | 6    | 6    | 3     | 3    | 3    | 3    | 3     | 3    | 3    | 3    |
| 74    | 74  | 74   | 74   | 14    | 13   | 14   | 14   | 73    | 73  | 73   | 73   | 46    | 46  | 46   | 46   | 79    | 79  | 79   | 79   | 13    | 13  | 13   | 13   | 1     | 1    | 1    | 1    | 2     | 2    | 2    | 2    |
| 10/2  | 9/1 | 10/2 | 10/2 | 12/9  | 10/2 | 11/2 | 12/8 | 10/2  | 9/1 | 10/2 | 10/2 | 11/9  | 9/2 | 10/1 | 11/3 | 10/1  | 8/3 | 10/1 | 10/1 | 10/2  | 9/1 | 10/2 | 10/2 | 12/2  | 12/1 | 12/1 | 12/2 | 12/1  | 12/4 | 12/9 | 12/1 |
| 6     | 1   | 1    | 4    | 8     | 8    | 5    | 12/8 | 6     | 1   | 1    | 4    | 7     | 7   | 9    | 11/3 | 9     | 0   | 1    | 5    | 6     | 1   | 1    | 4    | 3     | 1    | 0    | 4    | 9     | 12/4 | 12/9 | 8    |
| 100   | 100 | 100  | 100  | 100   | 100  | 100  | 100  | 100   | 100 | 100  | 100  | 100   | 100 | 100  | 100  | 100   | 100 | 100  | 100  | 100   | 100 | 100  | 100  | 100   | 100  | 100  | 100  | 100   | 100  | 100  | 100  |
| 50    | 50  | 50   | 50   | 26    | 20   | 24   | 26   | 50    | 50  | 50   | 50   | 51    | 48  | 48   | 49   | 63    | 63  | 63   | 63   | 20    | 20  | 20   | 20   | 15    | 15   | 15   | 15   | 14    | 13   | 13   | 14   |
| 61    | 61  | 61   | 61   | 16    | 15   | 15   | 16   | 61    | 61  | 61   | 61   | 31    | 30  | 30   | 30   | 65    | 65  | 65   | 65   | 15    | 15  | 15   | 15   | 2     | 2    | 2    | 2    | 2     | 2    | 2    | 2    |
| 10/2  | 9/6 | 10/1 | 10/2 | 12/7  | 10/2 | 11/9 | 12/6 | 10/2  | 9/6 | 10/1 | 10/2 | 10/2  | 9/1 | 10/1 | 10/2 | 10/1  | 8/2 | 10/6 | 10/1 | 10/2  | 9/6 | 10/1 | 10/2 | 12/1  | 12/3 | 12/6 | 12/1 | 12/1  | 11/2 | 12/5 | 12/1 |
| 3     | 6   | 6    | 0    | 0     | 0    | 11/9 | 12/6 | 3     | 9/6 | 6    | 0    | 8     | 5   | 3    | 4    | 5     | 4   | 10/6 | 1    | 3     | 9/6 | 6    | 0    | 8     | 12/3 | 12/6 | 12/1 | 5     | 1    | 12/5 | 4    |
| 100   | 100 | 100  | 100  | 100   | 100  | 100  | 100  | 100   | 100 | 100  | 100  | 100   | 100 | 100  | 100  | 100   | 100 | 100  | 100  | 100   | 100 | 100  | 100  | 100   | 100  | 100  | 100  | 100   | 100  | 100  | 100  |
| 46    | 46  | 46   | 46   | 11    | 9    | 9    | 11   | 46    | 46  | 46   | 46   | 35    | 35  | 35   | 35   | 57    | 57  | 57   | 57   | 9     | 9   | 9    | 9    | 8     | 7    | 7    | 8    | 6     | 4    | 5    | 6    |
| 76    | 76  | 76   | 76   | 13    | 12   | 12   | 13   | 75    | 75  | 75   | 75   | 41    | 41  | 41   | 41   | 80    | 80  | 80   | 80   | 12    | 12  | 12   | 12   | 1     | 1    | 1    | 1    | 2     | 2    | 2    | 2    |

Table S.B.4. Projected commercial Black Sea Bass closure dates, percent of annual catch limit (ACL) reached, and risk (in relative risk units) of right whale entanglement in pot gear under various proposed closure alternatives, with whale distribution based on below-average sea surface temperatures. See Table S.B.3 for additional information.

| Scenario and condition |                               | Alt 1 | Alt2 |     |     |     | Alt3 |      |      |      | Alt4 |      |      |      | Alt5 |      |      |      | Alt6 |      |      |      | Alt7a |     |      |      | Alt7b |     |      |      |
|------------------------|-------------------------------|-------|------|-----|-----|-----|------|------|------|------|------|------|------|------|------|------|------|------|------|------|------|------|-------|-----|------|------|-------|-----|------|------|
|                        |                               |       | S1   | S2  | S3  | S4  | S1   | S2   | S3   | S4   | S1   | S2   | S3   | S4   | S1   | S2   | S3   | S4   | S1   | S2   | S3   | S4   | S1    | S2  | S3   | S4   | S1    | S2  | S3   | S4   |
| A                      | Closure date                  |       | 10/2 | 8/4 | 9/2 | 9/2 | 12/5 | 10/1 | 10/2 | 12/3 | 12/3 | 12/2 | 12/1 | 12/3 | 12/2 | 12/1 | 12/1 | 12/2 | 12/2 | 12/2 | 12/1 | 12/2 | 10/1  | 8/1 | 10/1 | 10/1 | 10/1  | 8/1 | 10/6 | 10/7 |
|                        | %ACL                          | 97    | 100  | 100 | 100 | 100 | 100  | 100  | 100  | 100  | 100  | 100  | 100  | 100  | 100  | 100  | 100  | 100  | 100  | 100  | 100  | 100  | 100   | 100 | 100  | 100  | 100   | 100 | 100  | 100  |
|                        | Risk (North Carolina)         | 0     | 100  | 100 | 100 | 14  | 10   | 10   | 14   | 2    | 2    | 2    | 2    | 2    | 2    | 2    | 2    | 2    | 2    | 2    | 2    | 74   | 74    | 74  | 74   | 74   | 74    | 74  | 74   | 74   |
|                        | Risk (Florida-South Carolina) | 0     | 100  | 100 | 100 | 52  | 51   | 51   | 52   | 0    | 0    | 0    | 0    | 52   | 52   | 52   | 52   | 0    | 0    | 0    | 0    | 95   | 95    | 95  | 95   | 86   | 86    | 86  | 86   | 86   |
| B                      | Closure date                  |       | 10/2 | 8/4 | 9/2 | 9/2 | 12/3 | 10/1 | 11/4 | 12/2 | 12/2 | 12/1 | 12/1 | 12/2 | 12/1 | 12/2 | 12/8 | 12/1 | n/a  | 12/2 | 12/2 | n/a  | 10/1  | 8/2 | 10/1 | 10/1 | 10/1  | 8/2 | 10/1 | 10/9 |
|                        | %ACL                          | 97    | 100  | 100 | 100 | 100 | 100  | 100  | 100  | 100  | 100  | 100  | 100  | 100  | 100  | 100  | 100  | 100  | 100  | 100  | 100  | 100  | 100   | 100 | 100  | 100  | 100   | 100 | 100  | 100  |
|                        | Risk (North Carolina)         | 0     | 100  | 100 | 100 | 26  | 21   | 21   | 26   | 8    | 8    | 8    | 8    | 2    | 1    | 1    | 2    | 8    | 8    | 8    | 8    | 69   | 69    | 69  | 69   | 69   | 69    | 69  | 69   | 69   |
|                        | Risk (Florida-South Carolina) | 0     | 100  | 100 | 100 | 37  | 36   | 36   | 37   | 3    | 3    | 3    | 3    | 58   | 57   | 58   | 58   | 0    | 0    | 0    | 0    | 82   | 82    | 82  | 82   | 71   | 71    | 71  | 71   | 71   |
| C                      | Closure date                  |       | 10/2 | 8/4 | 9/2 | 9/2 | 11/2 | 10/4 | 10/2 | 11/1 | 12/2 | 12/7 | 12/1 | 12/1 | 12/1 | 12/1 | 12/6 | 12/1 | 12/2 | 12/7 | 12/1 | 12/1 | 10/1  | 8/1 | 10/1 | 10/1 | 10/1  | 8/1 | 10/6 | 10/7 |
|                        | %ACL                          | 97    | 100  | 100 | 100 | 100 | 100  | 100  | 100  | 100  | 100  | 100  | 100  | 100  | 100  | 100  | 100  | 100  | 100  | 100  | 100  | 100  | 100   | 100 | 100  | 100  | 100   | 100 | 100  | 100  |
|                        | Risk (North Carolina)         | 0     | 100  | 100 | 100 | 17  | 13   | 13   | 16   | 4    | 3    | 3    | 3    | 2    | 2    | 2    | 2    | 4    | 3    | 3    | 3    | 71   | 71    | 71  | 71   | 71   | 71    | 71  | 71   | 71   |
|                        | Risk (Florida-South Carolina) | 0     | 100  | 100 | 100 | 51  | 51   | 51   | 51   | 1    | 1    | 1    | 1    | 48   | 48   | 48   | 48   | 0    | 0    | 0    | 0    | 87   | 87    | 87  | 87   | 81   | 81    | 81  | 81   | 81   |

| Alt7c |     |      |      | Alt8a |      |      |      | Alt8b |     |      |      | Alt9a |     |      |      | Alt9b |     |      |      | Alt10 |     |      |      | Alt11 |      |      |      | Alt12 |      |      |      |   |
|-------|-----|------|------|-------|------|------|------|-------|-----|------|------|-------|-----|------|------|-------|-----|------|------|-------|-----|------|------|-------|------|------|------|-------|------|------|------|---|
| S1    | S2  | S3   | S4   | S1    | S2   | S3   | S4   | S1    | S2  | S3   | S4   | S1    | S2  | S3   | S4   | S1    | S2  | S3   | S4   | S1    | S2  | S3   | S4   | S1    | S2   | S3   | S4   | S1    | S2   | S3   | S4   |   |
| 10/2  | 9/6 | 10/1 | 10/2 | 12/1  | 10/2 | 12/1 | 12/1 | 10/2  | 9/6 | 10/1 | 10/2 | 10/3  | 9/2 | 10/1 | 10/2 | 10/1  | 8/2 | 10/7 | 10/1 | 10/2  | 9/6 | 10/1 | 10/1 | 12/2  | 12/1 | 12/1 | 12/2 | 12/2  | 12/1 | 12/1 | 12/2 |   |
| 3     |     | 6    | 0    | 2     | 7    |      | 1    | 3     |     | 6    | 0    | 1     | 0   | 5    | 7    | 4     | 3   |      | 1    | 3     |     | 6    | 9    | 8     | 8    | 3    | 7    | 3     | 0    | 1    | 2    |   |
| 100   | 100 | 100  | 100  | 100   | 100  | 100  | 100  | 100   | 100 | 100  | 100  | 100   | 100 | 100  | 100  | 100   | 100 | 100  | 100  | 100   | 100 | 100  | 100  | 100   | 100  | 100  | 100  | 100   | 100  | 100  | 100  |   |
| 48    | 48  | 48   | 48   | 7     | 6    | 7    | 7    | 48    | 48  | 48   | 48   | 26    | 26  | 26   | 26   | 54    | 54  | 54   | 54   | 6     | 6   | 6    | 6    | 3     | 3    | 3    | 3    | 3     | 3    | 3    | 3    |   |
| 76    | 76  | 76   | 76   | 54    | 53   | 54   | 54   | 77    | 77  | 77   | 77   | 72    | 72  | 72   | 72   | 83    | 83  | 83   | 83   | 53    | 53  | 53   | 53   | 5     | 5    | 5    | 5    | 5     | 7    | 7    | 7    | 7 |
| 10/2  | 9/1 | 10/2 | 10/2 | 12/9  | 10/2 | 11/2 | 12/8 | 10/2  | 9/1 | 10/2 | 10/2 | 11/9  | 9/2 | 10/1 | 11/3 | 10/1  | 8/3 | 10/1 | 10/1 | 10/2  | 9/1 | 10/2 | 10/2 | 12/2  | 12/1 | 12/1 | 12/2 | 12/1  | 12/4 | 12/9 | 12/1 |   |
| 6     | 1   | 1    | 4    |       | 8    | 5    |      | 6     | 1   | 1    | 4    |       | 7   | 9    |      | 9     | 0   | 1    | 5    | 6     | 1   | 1    | 4    | 3     | 1    | 0    | 4    | 9     |      |      | 8    |   |
| 100   | 100 | 100  | 100  | 100   | 100  | 100  | 100  | 100   | 100 | 100  | 100  | 100   | 100 | 100  | 100  | 100   | 100 | 100  | 100  | 100   | 100 | 100  | 100  | 100   | 100  | 100  | 100  | 100   | 100  | 100  | 100  |   |
| 50    | 50  | 50   | 50   | 26    | 20   | 24   | 26   | 50    | 50  | 50   | 50   | 51    | 48  | 48   | 49   | 63    | 63  | 63   | 63   | 20    | 20  | 20   | 20   | 15    | 15   | 15   | 15   | 14    | 13   | 13   | 14   |   |
| 64    | 64  | 64   | 64   | 58    | 57   | 58   | 58   | 68    | 68  | 68   | 68   | 69    | 68  | 68   | 69   | 73    | 73  | 73   | 73   | 58    | 58  | 58   | 58   | 12    | 12   | 12   | 12   | 7     | 7    | 7    | 7    |   |
| 10/2  | 9/6 | 10/1 | 10/2 | 12/7  | 10/2 | 11/9 | 12/6 | 10/2  | 9/6 | 10/1 | 10/2 | 10/2  | 9/1 | 10/1 | 10/2 | 10/1  | 8/2 | 10/6 | 10/1 | 10/2  | 9/6 | 10/1 | 10/2 | 12/1  | 12/3 | 12/6 | 12/1 | 12/1  | 11/2 | 12/5 | 12/1 |   |
| 3     |     | 6    | 0    |       | 0    |      |      | 3     |     | 6    | 0    | 8     | 5   | 3    | 4    | 5     | 4   |      | 1    | 3     |     | 6    | 0    | 8     |      | 7    |      | 5     | 1    |      | 4    |   |
| 100   | 100 | 100  | 100  | 100   | 100  | 100  | 100  | 100   | 100 | 100  | 100  | 100   | 100 | 100  | 100  | 100   | 100 | 100  | 100  | 100   | 100 | 100  | 100  | 100   | 100  | 100  | 100  | 100   | 100  | 100  | 100  |   |
| 46    | 46  | 46   | 46   | 11    | 9    | 9    | 11   | 46    | 46  | 46   | 46   | 35    | 35  | 35   | 35   | 57    | 57  | 57   | 57   | 9     | 9   | 9    | 9    | 8     | 7    | 7    | 8    | 6     | 4    | 5    | 6    |   |
| 71    | 71  | 71   | 71   | 50    | 49   | 49   | 50   | 71    | 71  | 71   | 71   | 67    | 67  | 67   | 67   | 76    | 76  | 76   | 76   | 50    | 50  | 50   | 50   | 8     | 8    | 8    | 8    | 9     | 9    | 9    | 9    |   |
