# Supplementary material
Source: publisher figshare collection journal article supplement (https://tandf.figshare.com/articles/dataset/_/3408067)
Supplement: Supplementary file 2 [file 1]

## Supplement A: SAFMC Snapper-Grouper Regulatory Amendment 16—Pot Gear Closure Alternatives

*Alternative 1 the (status quo).*—The retention and possession of and fishing for Black Sea Bass using Black Sea Bass pot gear is prohibited annually from November 1 to April 30; Black Sea Bass are managed in the South Atlantic Exclusive Economic Zone (EEZ) south of Cape Hatteras, North Carolina (Figure S.A.1).

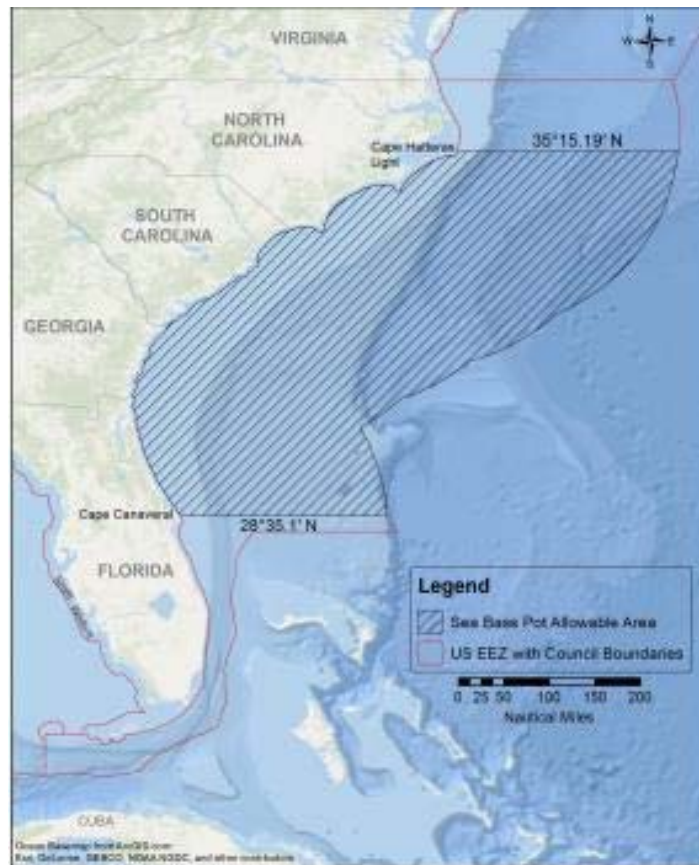

Figure S.A.1. Jurisdictional boundaries of the South Atlantic Fishery Management Council and the allowable Black Sea Bass pot area.

*Alternative 2.*—The Black Sea Bass pot closure applies to the area currently designated as North Atlantic right whale critical habitat (Figure S.A.2). This critical habitat encompasses waters between 31°15'N (at approximately the mouth of the Altamaha River, Georgia) and 30°15'N (at approximately Jacksonville, Florida) from the shoreline out to 15 nautical miles offshore and the waters between 30°15'N and 28°00'N (at approximately Sebastian Inlet, Florida) from the shoreline out to 5 nautical miles. The closure applies to the area annually from November 15 to April 15 (USOFR 1994).

The area in question represents North Atlantic right whale critical habitat in the South Atlantic region designated on June 3, 1994. The critical habitat designation did not provide waypoints for the boundary, and the boundary would not automatically change if the boundary for the right whale critical habitat were to change. North Atlantic right whale critical habitat is currently undergoing a revision based on more current data (for the proposed changes, see USOFR 2015).

Note that under all alternatives federal regulations would only apply to that portion of the area within the South Atlantic EEZ; the states will be asked to implement compatible regulations within state waters.

The source for all of the data in this supplement is Amanda Frick, National Marine Fisheries Service (NMFS), personal communication.

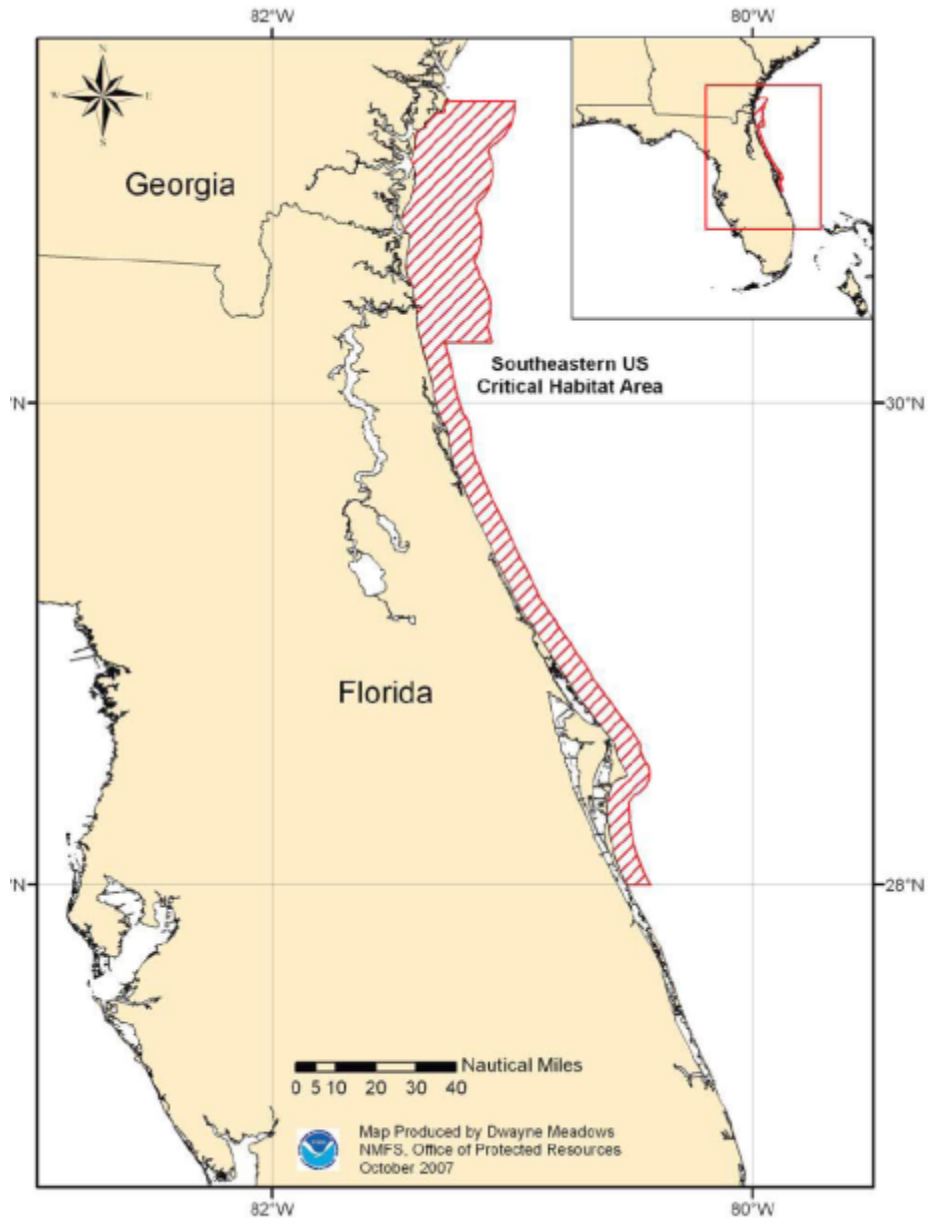

Figure S.A.2. Area for the proposed Black Sea Bass pot closure under alternative 2.

*Alternative 3.*—The Black Sea Bass pot closure applies to waters inshore of points 1–15 listed below (Table S.A.1), lying approximately between Ponce Inlet, Florida, and Cape Hatteras, North Carolina (Figure S.A.3). The closure applies to the area annually from November 1 to April 30.

This area likely represents North Atlantic right whale calving habitat. The portion from Cape Fear, North Carolina, south to 29°N (approximately Ponce Inlet, Florida) is based on model outputs (Garrison 2007; Good 2008; Keller et al. 2012). The portion from Cape Fear to Cape Hatteras, North Carolina, is an extrapolation of those model outputs based on sea surface temperatures and bathymetry.

Table S.A.1. Eastern boundary coordinates for the proposed Black Sea Bass pot closure under alternative 3.

| Point | North latitude | West longitude     |
|-------|----------------|--------------------|
| 1     | 35°15′         | State/EEZ boundary |
| 2     | 35°15′         | 75°12′             |
| 3     | 34°51′         | 75°45′             |
| 4     | 34°21′         | 76°18′             |
| 5     | 34°21′         | 76°45′             |
| 6     | 34°12′         | 77°21′             |
| 7     | 33°37′         | 77°47′             |
| 8     | 33°28′         | 78°33′             |
| 9     | 32°59′         | 78°50′             |
| 10    | 32°17′         | 79°53′             |
| 11    | 31°31′         | 80°33′             |
| 12    | 30°43′         | 80°49′             |
| 13    | 30°30′         | 81°01′             |
| 14    | 29°45′         | 81°01′             |
| 15    | 29°00′         | State/EEZ boundary |

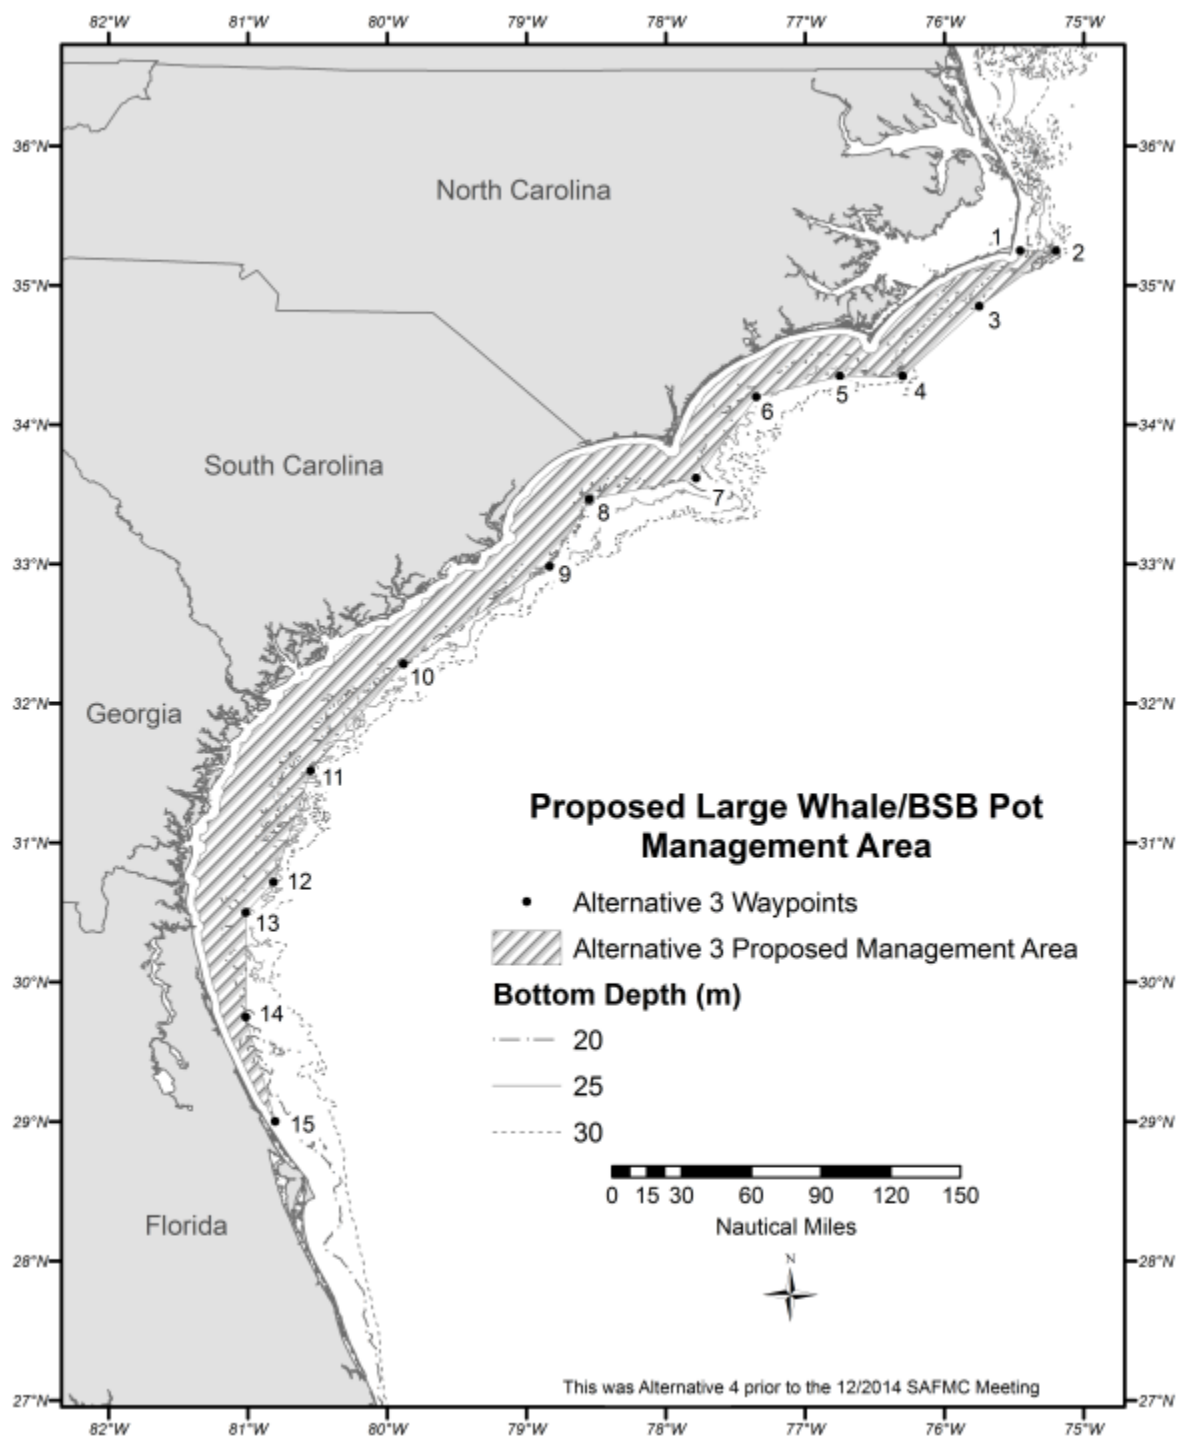

Figure S.A.3. Area for the proposed Black Sea Bass pot closure under alternative 3.

*Alternative 4.*—The Black Sea Bass pot closure applies to waters inshore of points 1–28 listed below (Table S.A.2), lying approximately between Cape Canaveral, Florida, and Cape Hatteras, North Carolina (Figure S.A.4). The closure applies to the area annually from November 1 to April 30.

This area generally represents waters 25 m or shallower from 28°21'N (approximately Cape Canaveral, Florida) to Savannah, Georgia; from the Georgia–South Carolina border to Cape Hatteras, North Carolina, the closure applies to waters under SAFMC management that are 30 m or shallower. This bathymetric area is based on right whale sightings (all demographic segments) and sightings per unit of effort (a proxy for density) by depth and captures 97% and 96% of right whale sightings off the North Carolina–South Carolina and Florida–Georgia coasts, respectively.

Table S.A.2. Eastern boundary coordinates for the proposed Black Sea Bass pot closure under alternative 4.

| Point | North latitude | West longitude     | Point | North latitude | West longitude     |
|-------|----------------|--------------------|-------|----------------|--------------------|
| 1     | 35°15'         | State/EEZ boundary | 15    | 33°01'         | 78°38'             |
| 2     | 35°15'         | 75°08'             | 16    | 32°40'         | 79°01'             |
| 3     | 34°58'         | 75°41'             | 17    | 32°36'         | 79°18'             |
| 4     | 34°49'         | 75°50'             | 18    | 32°19'         | 79°22'             |
| 5     | 34°47'         | 76°05'             | 19    | 32°16'         | 79°37'             |
| 6     | 34°31'         | 76°18'             | 20    | 32°03'         | 79°48'             |
| 7     | 34°20'         | 76°13'             | 21    | 31°39'         | 80°27'             |
| 8     | 34°12'         | 77°00'             | 22    | 30°58'         | 80°47'             |
| 9     | 33°43'         | 77°30'             | 23    | 30°13'         | 81°01'             |
| 10    | 33°21'         | 77°21'             | 24    | 29°32'         | 80°39'             |
| 11    | 33°18'         | 77°41'             | 25    | 29°22'         | 80°44'             |
| 12    | 33°22'         | 77°56'             | 26    | 28°50'         | 80°22'             |
| 13    | 33°12'         | 78°20'             | 27    | 28°21'         | 80°18'             |
| 14    | 33°05'         | 78°22'             | 28    | 28°21'         | State/EEZ boundary |

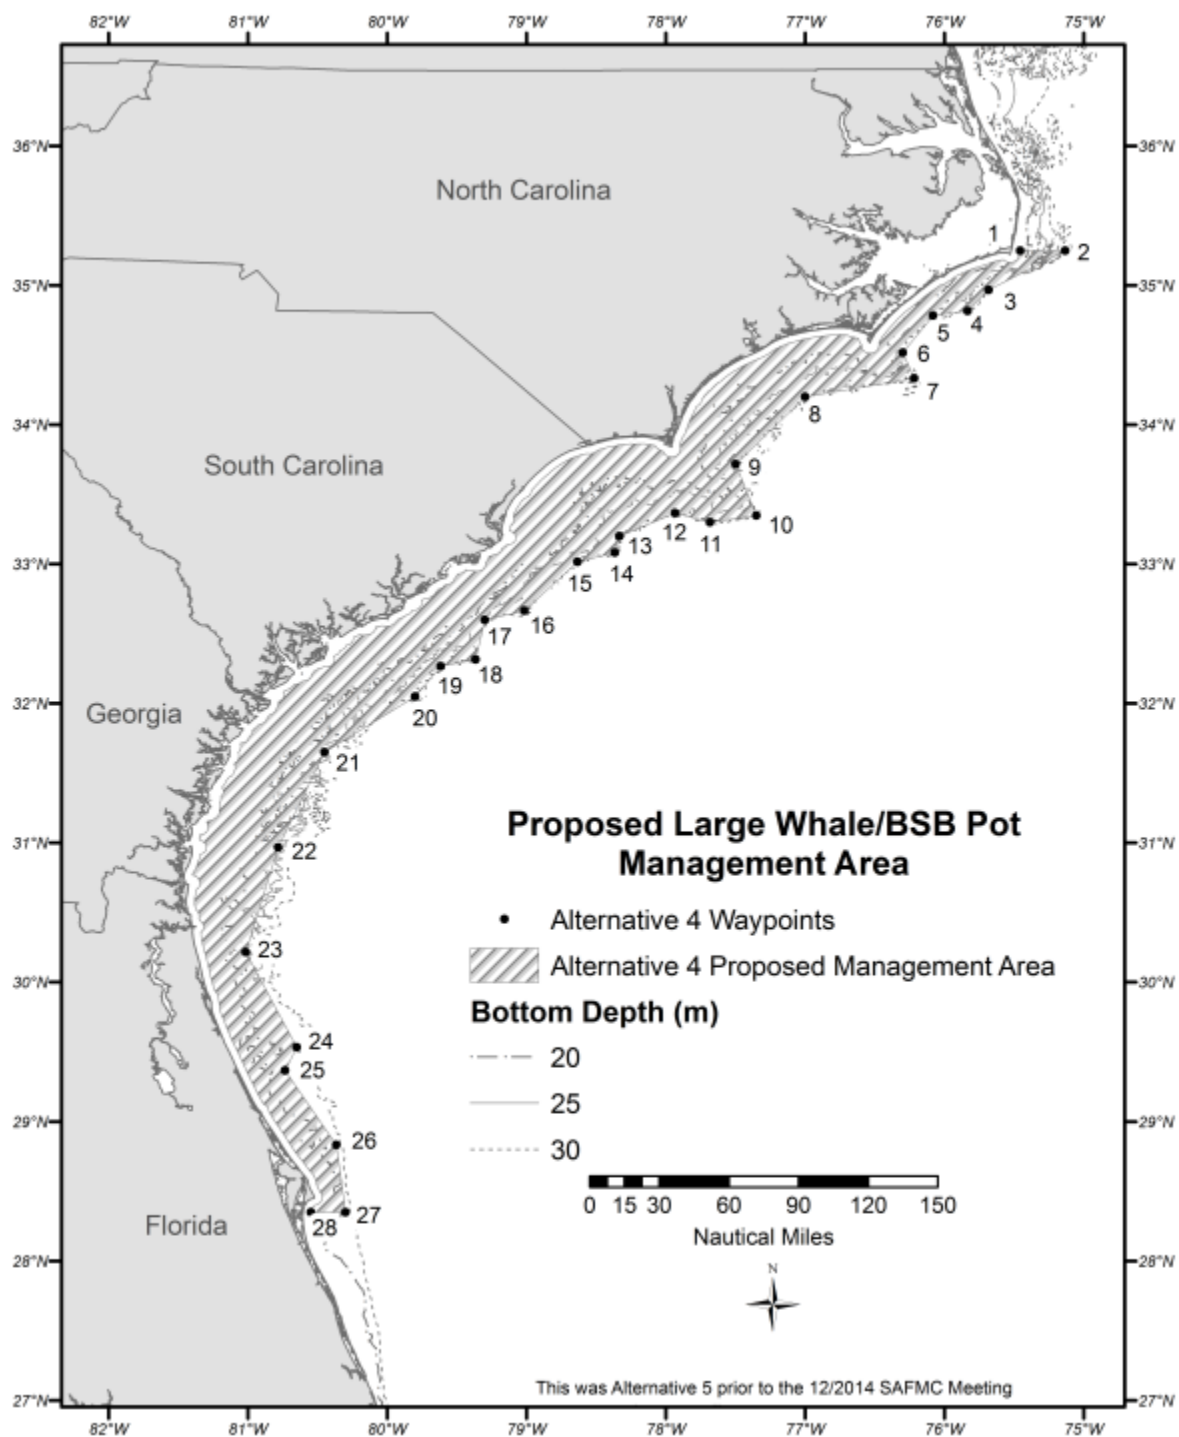

Figure S.A.4. Area for the proposed Black Sea Bass pot closure under alternative 4.

*Alternative 5.*—The Black Sea Bass pot closure applies to waters inshore of points 1–28 listed below (Table S.A.3), lying approximately between Daytona Beach, Florida, and Cape Hatteras, North Carolina (Figure S.A.5). The closure applies to the area annually from November 1 to April 30.

This area is based on joint comments received from nongovernmental organizations (dated January 3, 2014) in response to the NMFS’s December 4, 2013, Federal Register Notice of Intent to Prepare this Draft Environmental Impact Statement (USOFR 2013). The organizations proposed the area as a reasonable alternative for consideration. The area—which was also included in a Center for Biological Diversity, Defenders of Wildlife, The Humane Society of the United States, and Whale and Dolphin Conservation petition in 2009 for right whale critical habitat—is off the coasts of Georgia and Florida and based on calving right whale habitat modeling work of Garrison (2007) and Keller et al. (2012). This area represents the 75th percentile of sightings (91% of historical sightings included in their study) off Florida and Georgia (Garrison 2007; Keller et al. 2012). Off the coasts of North Carolina and South Carolina, the closure extends from the start of the EEZ to 30 nautical miles offshore.

Table S.A.3. Eastern boundary coordinates for the proposed Black Sea Bass pot closure under alternative 5.

| Point | North latitude | West longitude     | Point | North latitude | West longitude     |
|-------|----------------|--------------------|-------|----------------|--------------------|
| 1     | 35°15′         | State/EEZ boundary | 15    | 33°21′         | 77°45′             |
| 2     | 35°15′         | 74°54′             | 16    | 33°19′         | 78°02′             |
| 3     | 35°03′         | 74°57′             | 17    | 33°24′         | 78°17′             |
| 4     | 34°51′         | 75°06′             | 18    | 33°14′         | 78°33′             |
| 5     | 34°45′         | 75°18′             | 19    | 32°55′         | 78°39′             |
| 6     | 34°43′         | 75°33′             | 20    | 32°39′         | 78°56′             |
| 7     | 34°26′         | 75°57′             | 21    | 31°42′         | 80°24′             |
| 8     | 34°12′         | 76°07′             | 22    | 31°31′         | 80°33′             |
| 9     | 34°04′         | 76°26′             | 23    | 30°43′         | 80°49′             |
| 10    | 34°05′         | 76°41′             | 24    | 30°30′         | 81°01′             |
| 11    | 34°10′         | 76°55′             | 25    | 29°45′         | 81°01′             |
| 12    | 33°58′         | 77°16′             | 26    | 29°31′         | 80°58′             |
| 13    | 33°41′         | 77°23′             | 27    | 29°13′         | 80°52′             |
| 14    | 33°28′         | 77°32′             | 28    | 29°13′         | State/EEZ boundary |

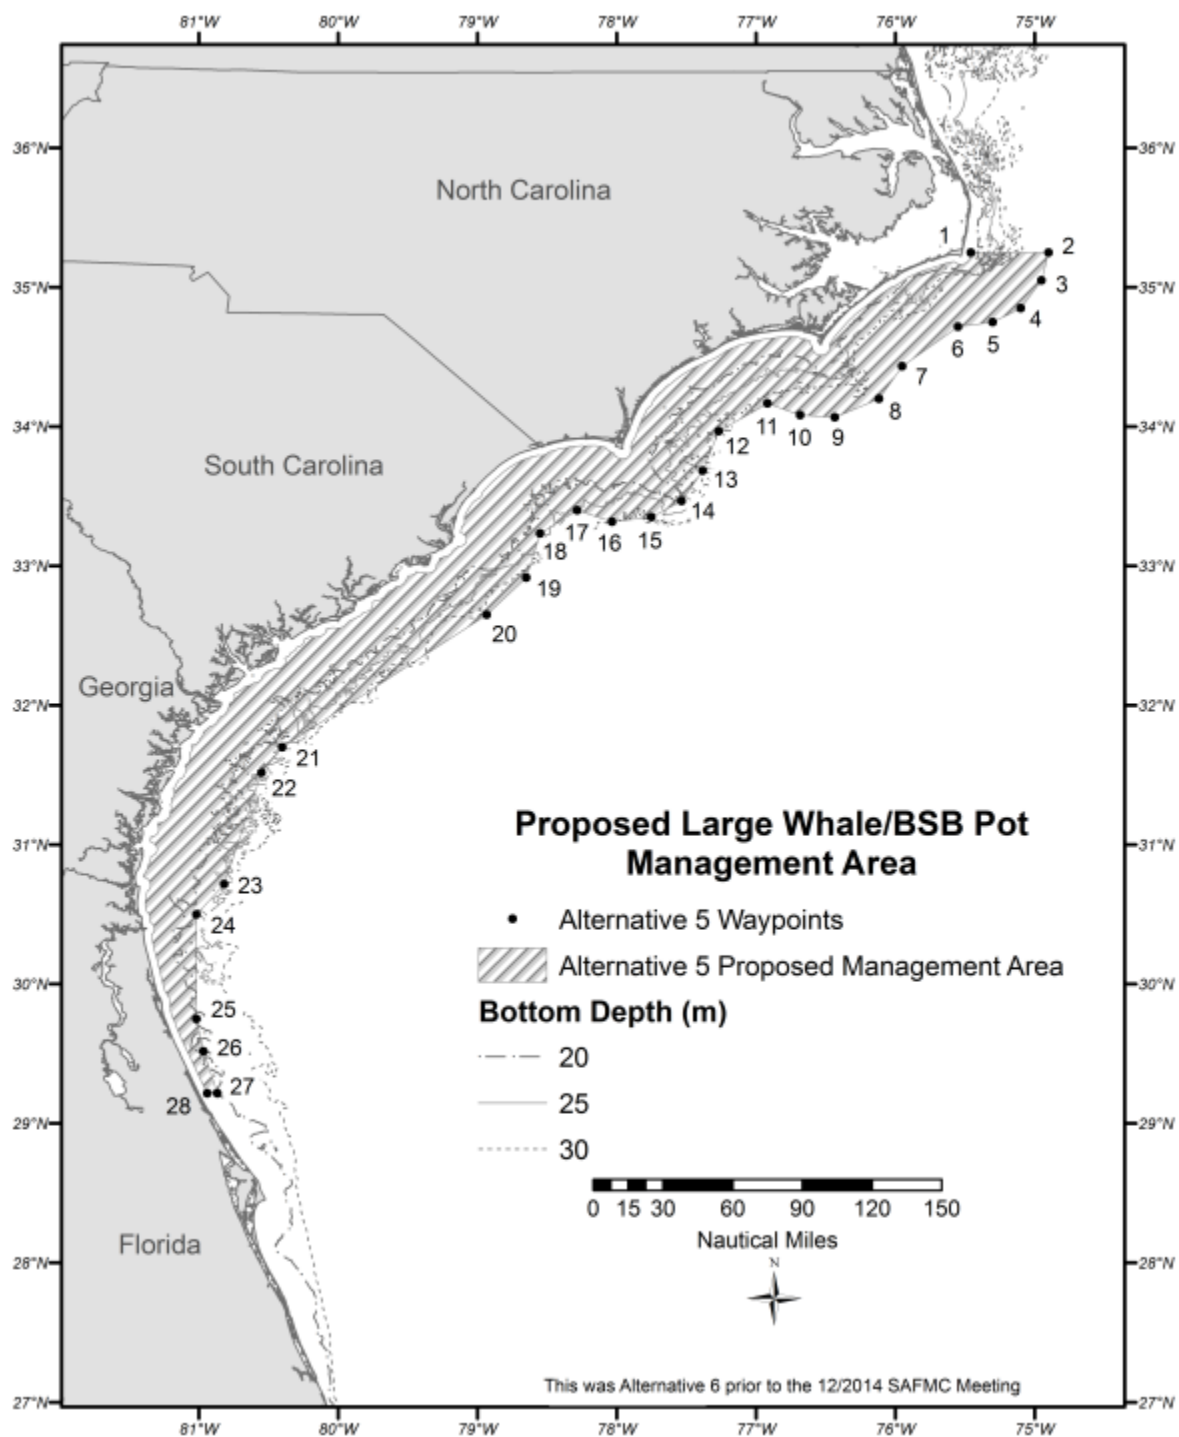

Figure S.A.5. Area for the proposed Black Sea Bass pot closure under alternative 5.

*Alternative 6.*—The Black Sea Bass pot closure applies to waters inshore of points 1–20 listed below (Table S.A.4), lying approximately between Sebastian, Florida, and Cape Hatteras, North Carolina (Figure S.A.6). The closure applies to the area annually from November 1 to April 30.

This area is also based on joint comments received from a number of environmental groups (dated January 3, 2014) in response to NMFS’s December 4, 2013, Federal Register Notice of Intent to Prepare this Draft Environmental Impact Statement (USOFR 2013). The environmental groups proposed the area as a reasonable alternative for consideration. This area represents an existing management area, the Southeast Seasonal Gill-Net Restricted Area, under the Atlantic Large Whale Take Reduction Plan (ALWTRP) and an additional area off North Carolina. The area off North Carolina includes waters shallower than 30 m and is northward of the designated ALWTRP Southeast Restricted Area.

Table S.A.4. Eastern boundary coordinates for the proposed Black Sea Bass pot closure under alternative 6.

| Point | North latitude | West longitude     |
|-------|----------------|--------------------|
| 1     | 35°15′         | State/EEZ boundary |
| 2     | 35°15′         | 75°08′             |
| 3     | 34°58′         | 75°41′             |
| 4     | 34°49′         | 75°50′             |
| 5     | 34°47′         | 76°05′             |
| 6     | 34°31′         | 76°18′             |
| 7     | 34°20′         | 76°13′             |
| 8     | 34°12′         | 77°00′             |
| 9     | 33°43′         | 77°30′             |
| 10    | 33°21′         | 77° 21′            |
| 11    | 33°18′         | 77°41′             |
| 12    | 33°22′         | 77°56′             |
| 13    | 33°19′         | 78°06′             |
| 14    | 32°58′         | 78°39′             |
| 15    | 32°39′         | 78°59′             |
| 16    | 32°37′         | 79°14′             |
| 17    | 32°22′         | 79°22′             |
| 18    | 32°00′         | 80°00′             |
| 19    | 27°51′         | 80°00′             |
| 20    | 27°51′         | State/EEZ boundary |

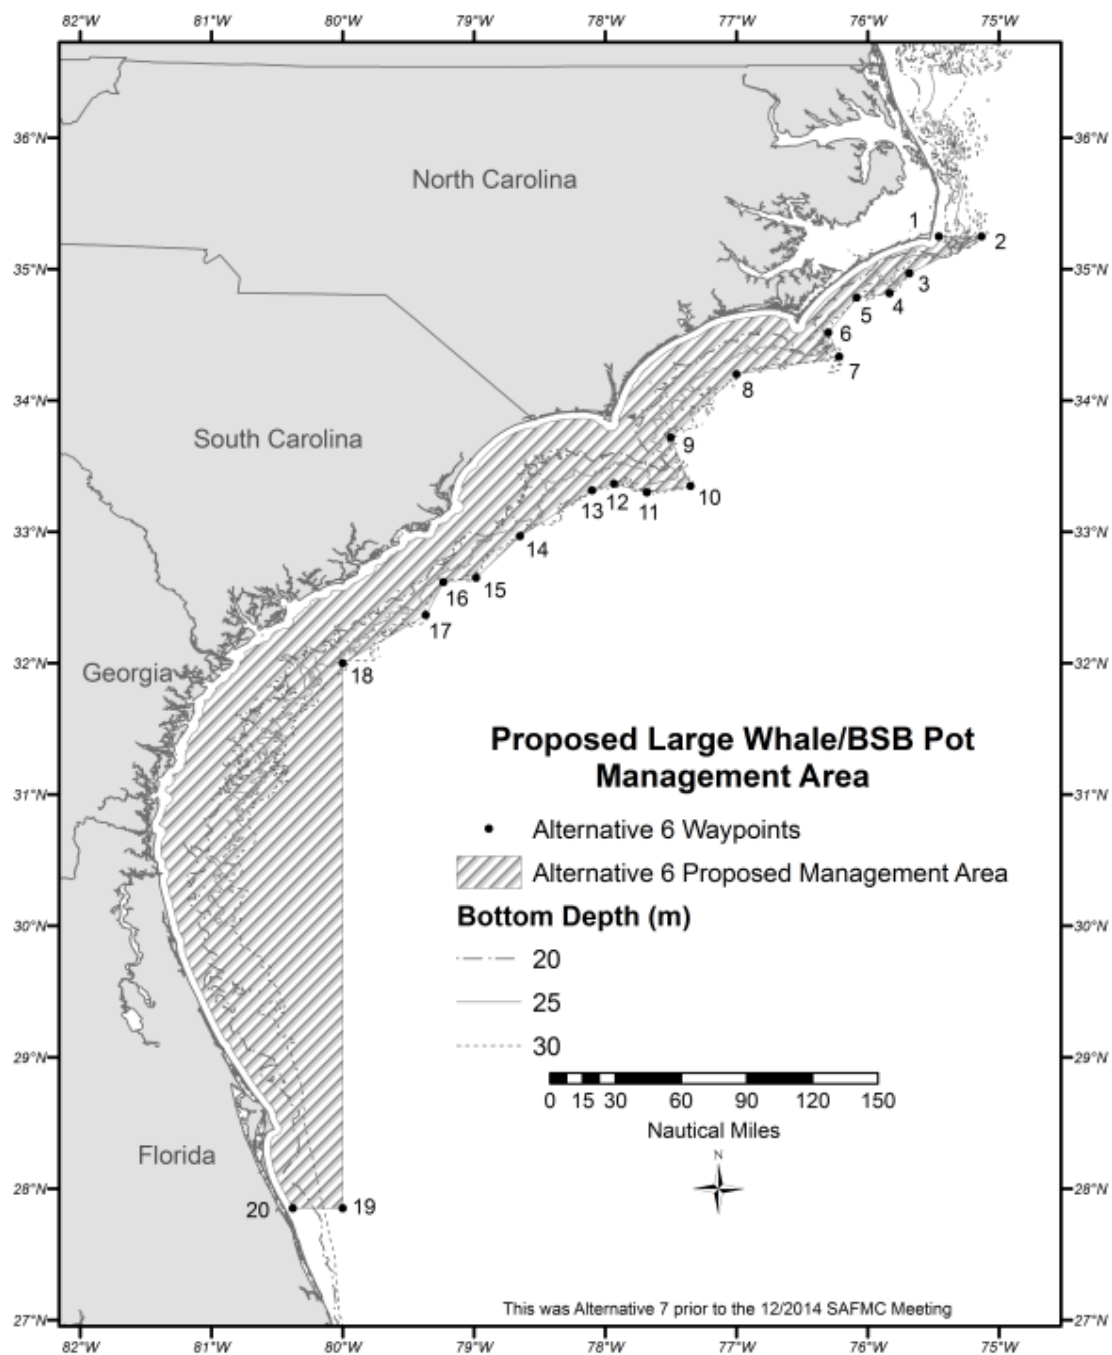

Figure S.A.6. Area for the proposed Black Sea Bass pot closure under alternative 6.

*Alternative 7.*—The Black Sea Bass pot closure applies to the area currently designated as North Atlantic right whale critical habitat in addition to waters inshore of points 1–29 listed below (Table S.A.5), lying approximately from north of the Altamaha River, Georgia, to Cape Hatteras, North Carolina (Figure S.A.7).

Subalternative 7a: The Black Sea Bass pot closure applies to the area annually from November 1 to December 15 and from March 15 to April 30.

Subalternative 7b: For the area off North Carolina and South Carolina, the Black Sea Bass pot closure applies annually from November 1 to December 15 and from March 15 to April 30. For the area off Georgia and Florida, the Black Sea Bass pot closure applies annually from November 15 to April 15.

Subalternative 7c: For the area off North Carolina and South Carolina, the Black Sea Bass pot closure applies annually from February 15 to April 30. For the area off Georgia and Florida, the Black Sea Bass pot closure applies annually from November 15 to April 15.

This area represents existing North Atlantic right whale critical habitat in the South Atlantic region designated on June 3, 1994. This habitat is currently undergoing a revision based on more current data; proposed changes are published at (USOFR 2016). Off North Carolina and South Carolina, the Black Sea Bass pot closure applies in the EEZ in waters shallower than 25 m. The eastern boundary of the closure between these two areas was formed by drawing a straight line from the southeastern corner waypoint of the northern portion (North Carolina–South Carolina) to the northeastern corner waypoint of the southern section (Florida–Georgia).

Table S.A.5. Eastern boundary coordinates for the proposed Black Sea Bass pot closure under alternative 7.

| Point | North latitude | West longitude     | Point | North latitude | West longitude |
|-------|----------------|--------------------|-------|----------------|----------------|
| 1     | 35°15′         | State/EEZ boundary | 22    | 32°56′         | 78°57′         |
| 2     | 35°15′         | 75°09′             | 23    | 32°44′         | 79°04′         |
| 3     | 35°06′         | 75°22′             | 24    | 32°42′         | 79°13′         |
| 4     | 35°06′         | 75°39′             | 25    | 32°34′         | 79°23′         |
| 5     | 35°01′         | 75°47′             | 26    | 32°25′         | 79°25′         |
| 6     | 34°54′         | 75°46′             | 27    | 32°23′         | 79°37′         |
| 7     | 34°52′         | 76°04′             | 28    | 31°53′         | 80°09′         |
| 8     | 34°33′         | 76°22′             | 29    | 31°15′         | 80°59′         |
| 9     | 34°23′         | 76°18′             | 30    | 30°56′         | 81°05′         |

| Point | North latitude | West longitude | Point | North latitude | West longitude     |
|-------|----------------|----------------|-------|----------------|--------------------|
| 10    | 34°21′         | 76°27′         | 31    | 30°42′         | 81°07′             |
| 11    | 34°25′         | 76°51′         | 32    | 30°15′         | 81°05′             |
| 12    | 34°09′         | 77°19′         | 33    | 30°15′         | 81°17′             |
| 13    | 33°44′         | 77°38′         | 34    | 29°40′         | 81°07′             |
| 14    | 33°25′         | 77°27′         | 35    | 29°08′         | 80°51′             |
| 15    | 33°22′         | 77°40′         | 36    | 28°36′         | 80°28′             |
| 16    | 33°28′         | 77°41′         | 37    | 28°26′         | 80°25′             |
| 17    | 33°32′         | 77°53′         | 38    | 28°20′         | 80°31′             |
| 18    | 33°22′         | 78°26′         | 39    | 28°11′         | 80° 30′            |
| 19    | 33°06′         | 78°31′         | 40    | 28°00′         | 80°25′             |
| 20    | 33°05′         | 78°40′         | 41    | 28°00′         | State/EEZ boundary |
| 21    | 33°01′         | 78°43′         |       |                |                    |

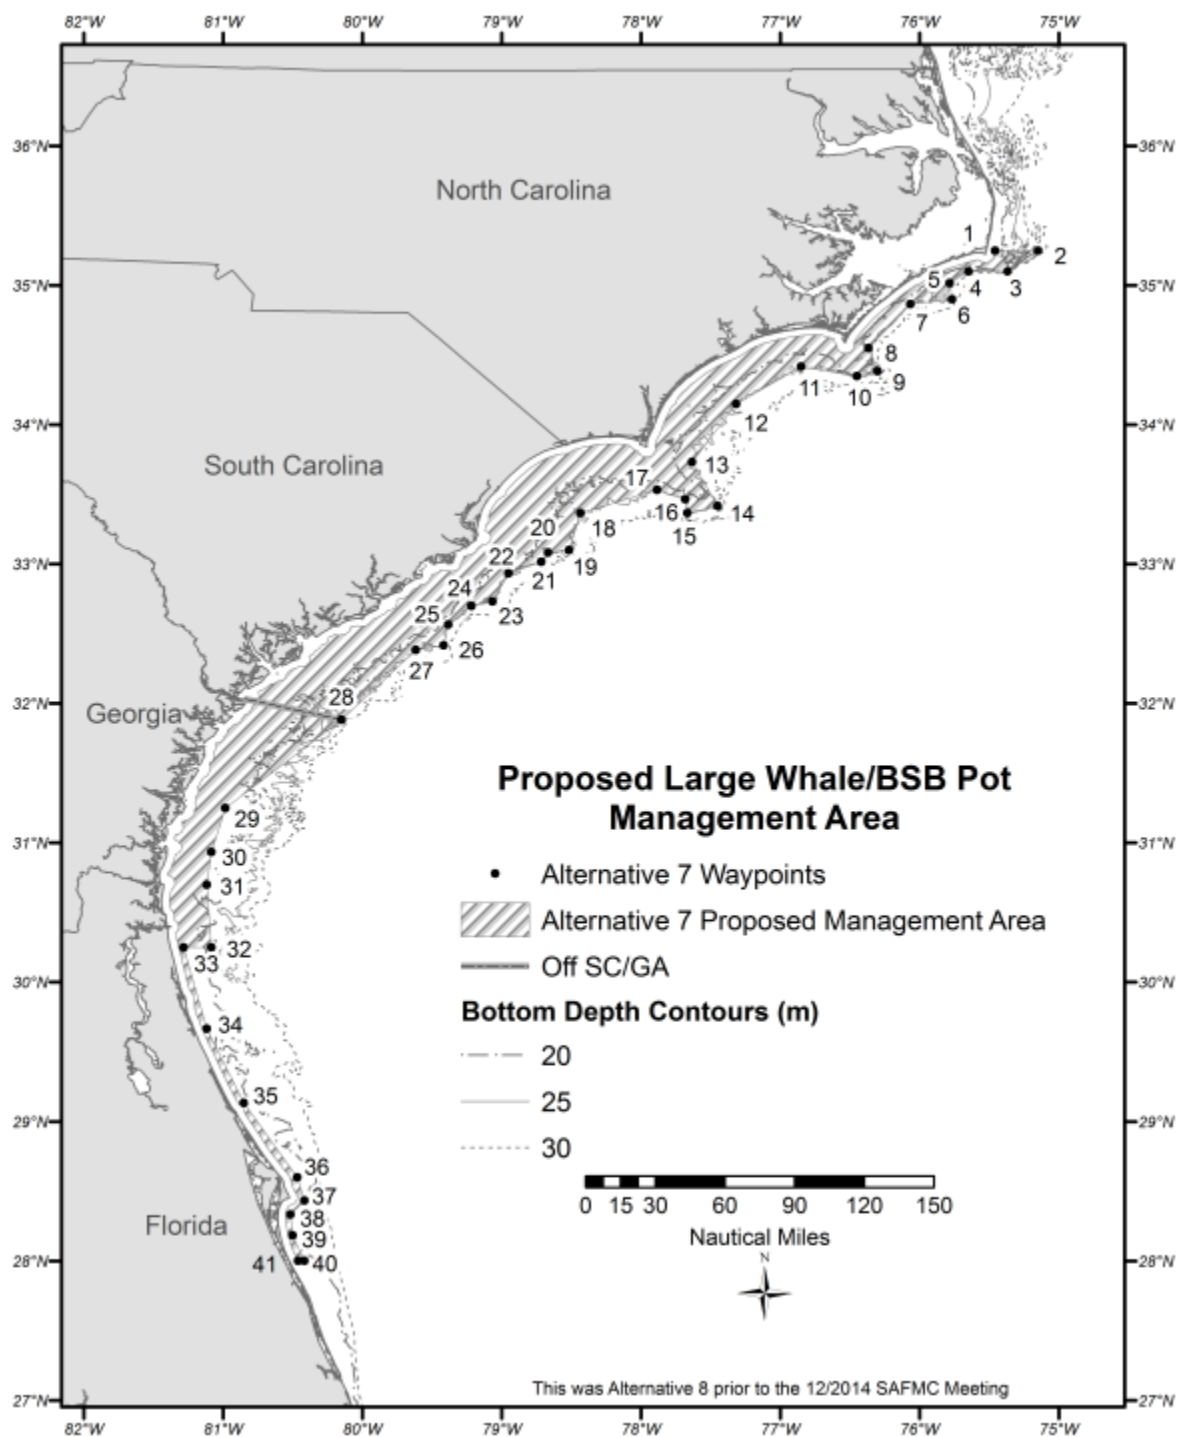

Figure S.A.7. Area for the proposed Black Sea Bass pot closure under alternative 7.

*Alternative 8.*—The Black Sea Bass pot closure applies to waters inshore of points 1–35 listed below (Table S.A.6), lying approximately between Daytona Beach, Florida, and Cape Hatteras, North Carolina (Figure S.A.8).

Subalternative 8a: The Black Sea Bass pot closure applies to the area annually from November 1 to April 15.

Subalternative 8b: For the area off North Carolina and South Carolina, the Black Sea Bass pot closure applies annually from November 1 to December 15 and from February 15 to April 30. For the area off Georgia and Florida, the Black Sea Bass pot closure applies annually from November 15 to April 15.

In alternative 8, the boundaries off Florida and Georgia are identical to the boundaries in alternative 5. Off North Carolina and South Carolina, the Black Sea Bass pot closure applies in the EEZ in waters shallower than 25 m.

Table S.A.6. Eastern boundary coordinates for the proposed Black Sea Bass pot closure under alternative 8.

| Point | North latitude | West longitude     | Point | North latitude | West longitude     |
|-------|----------------|--------------------|-------|----------------|--------------------|
| 1     | 35°15′         | State/EEZ boundary | 19    | 33°06′         | 78°31′             |
| 2     | 35°15′         | 75°09′             | 20    | 33°05′         | 78°40′             |
| 3     | 35°06′         | 75°22′             | 21    | 33°01′         | 78°43′             |
| 4     | 35°06′         | 75°39′             | 22    | 32°56′         | 78°57′             |
| 5     | 35°01′         | 75°47′             | 23    | 32°44′         | 79°04′             |
| 6     | 34°54′         | 75°46′             | 24    | 32°42′         | 79°13′             |
| 7     | 34°52′         | 76°04′             | 25    | 32°34′         | 79°23′             |
| 8     | 34°33′         | 76°22′             | 26    | 32°25′         | 79°25′             |
| 9     | 34°23′         | 76°18′             | 27    | 32°23′         | 79° 37′            |
| 10    | 34°21′         | 76°27′             | 28    | 31°53′         | 80°09′             |
| 11    | 34°25′         | 76°51′             | 29    | 31°31′         | 80°33′             |
| 12    | 34°09′         | 77°19′             | 30    | 30°43′         | 80°49′             |
| 13    | 33°44′         | 77°38′             | 31    | 30°30′         | 81°01′             |
| 14    | 33°25′         | 77°27′             | 32    | 29°45′         | 81°01′             |
| 15    | 33°22′         | 77°40′             | 33    | 29°31′         | 80° 58′            |
| 16    | 33°28′         | 77°41′             | 34    | 29°13′         | 80°52′             |
| 17    | 33°32′         | 77°53′             | 35    | 29°13′         | State/EEZ boundary |
| 18    | 33°22′         | 78°26′             |       |                |                    |

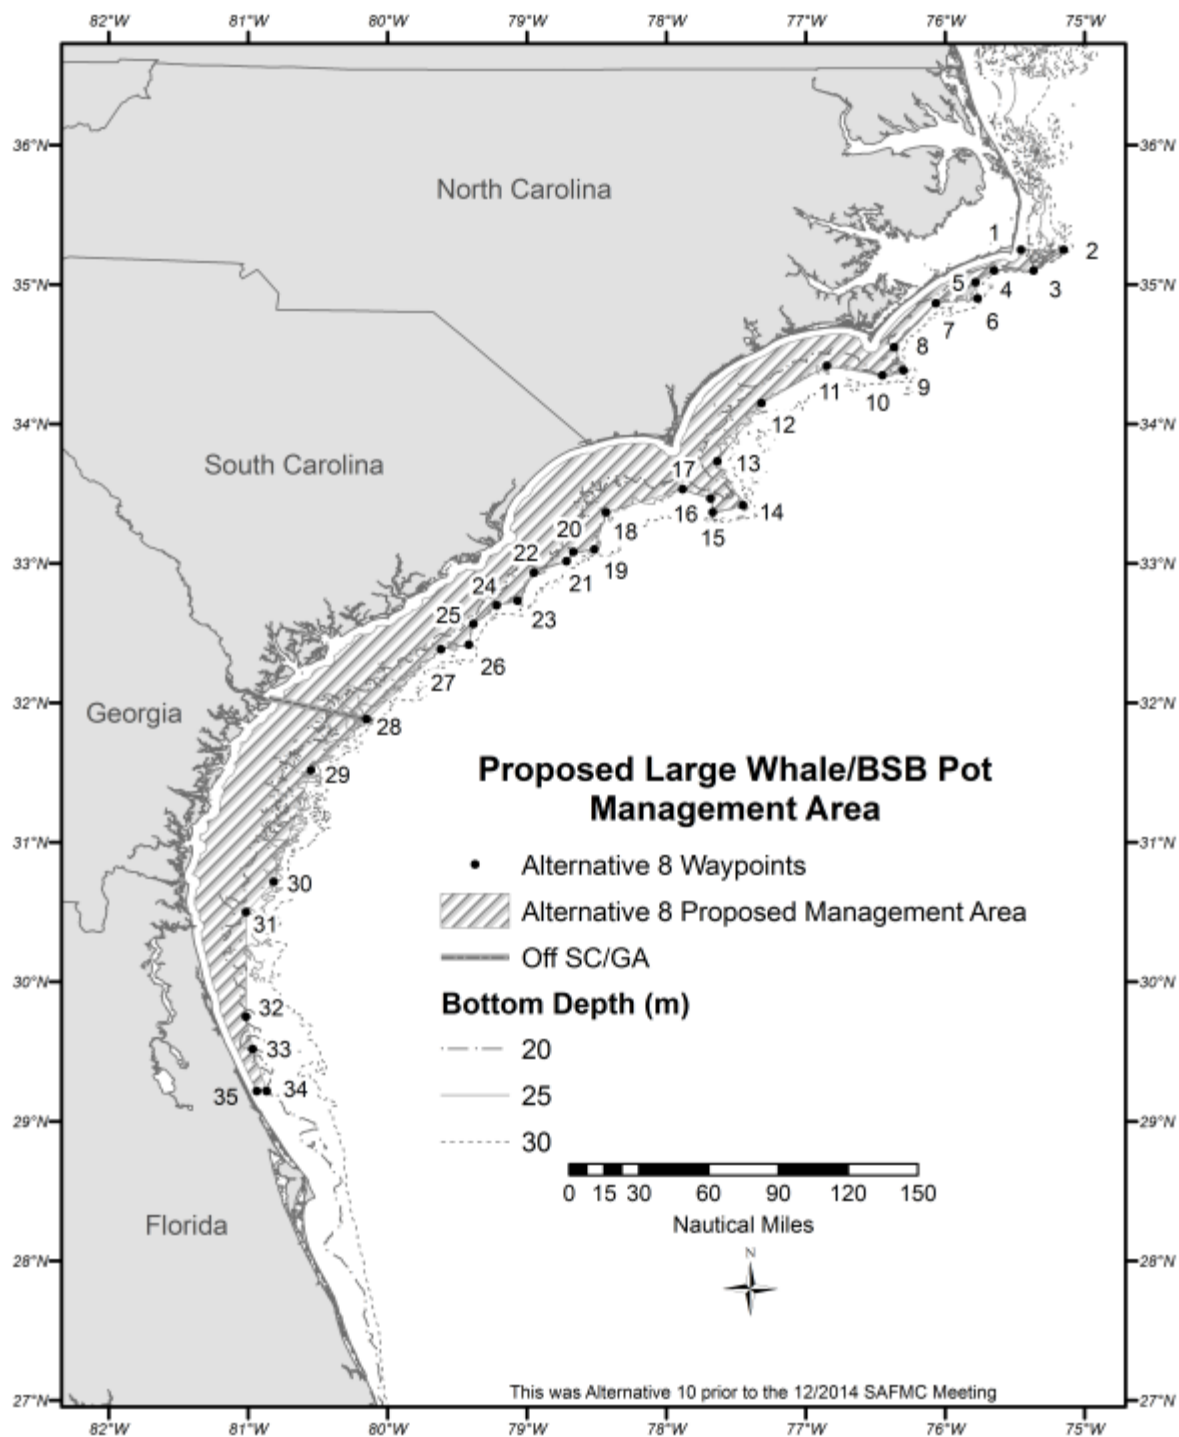

Figure S.A.8. Area for the proposed Black Sea Bass pot closure under alternative 8.

*Alternative 9.*—The Black Sea Bass pot closure applies to waters inshore of points 1–28 listed below (Table S.A.7), lying approximately between Daytona Beach, Florida, and Cape Hatteras, North Carolina (Figure S.A.9).

Subalternative 9a: The Black Sea Bass pot closure applies to the area annually from November 1 to April 15.

Subalternative 9b: For the area off North Carolina and South Carolina, the Black Sea Bass pot closure applies annually from November 1 to December 15 and from February 15 to April 30. For the area off Georgia and Florida, the Black Sea Bass pot closure applies annually from November 15 to April 15.

In this alternative, the boundaries off Florida and Georgia are identical to those in alternative 5. Off North Carolina and South Carolina, the Black Sea Bass pot closure applies in the EEZ in waters shallower than 20 m.

Table S.A.7. Eastern boundary coordinates for the proposed Black Sea Bass pot closure under alternative 9.

| Point | North latitude | West longitude     | Point | North latitude | West longitude     |
|-------|----------------|--------------------|-------|----------------|--------------------|
| 1     | 35° 15'        | State/EEZ boundary | 15    | 33°36'         | 77°55'             |
| 2     | 35°15'         | 75°20'             | 16    | 33°34'         | 78°28'             |
| 3     | 35°05'         | 75°24'             | 17    | 32° 59'        | 78°52'             |
| 4     | 35°08'         | 75° 38'            | 18    | 32°59'         | 79°02'             |
| 5     | 35°04'         | 75°52'             | 19    | 32°31'         | 79°30'             |
| 6     | 34°51'         | 76°11'             | 20    | 31°57'         | 80°27'             |
| 7     | 34°36'         | 76°24'             | 21    | 31°42'         | 80°24'             |
| 8     | 34°24'         | 76°19'             | 22    | 31°31'         | 80°33'             |
| 9     | 34°21'         | 76°27'             | 23    | 30°43'         | 80°49'             |
| 10    | 34°33'         | 76°48'             | 24    | 30°30'         | 81°01'             |
| 11    | 34°16'         | 77°25'             | 25    | 29°45'         | 81°01'             |
| 12    | 33°44'         | 77°46'             | 26    | 29° 31'        | 80°58'             |
| 13    | 33°30'         | 77°31'             | 27    | 29°13'         | 80°52'             |
| 14    | 33°28'         | 77°35'             | 28    | 29°13'         | State/EEZ boundary |

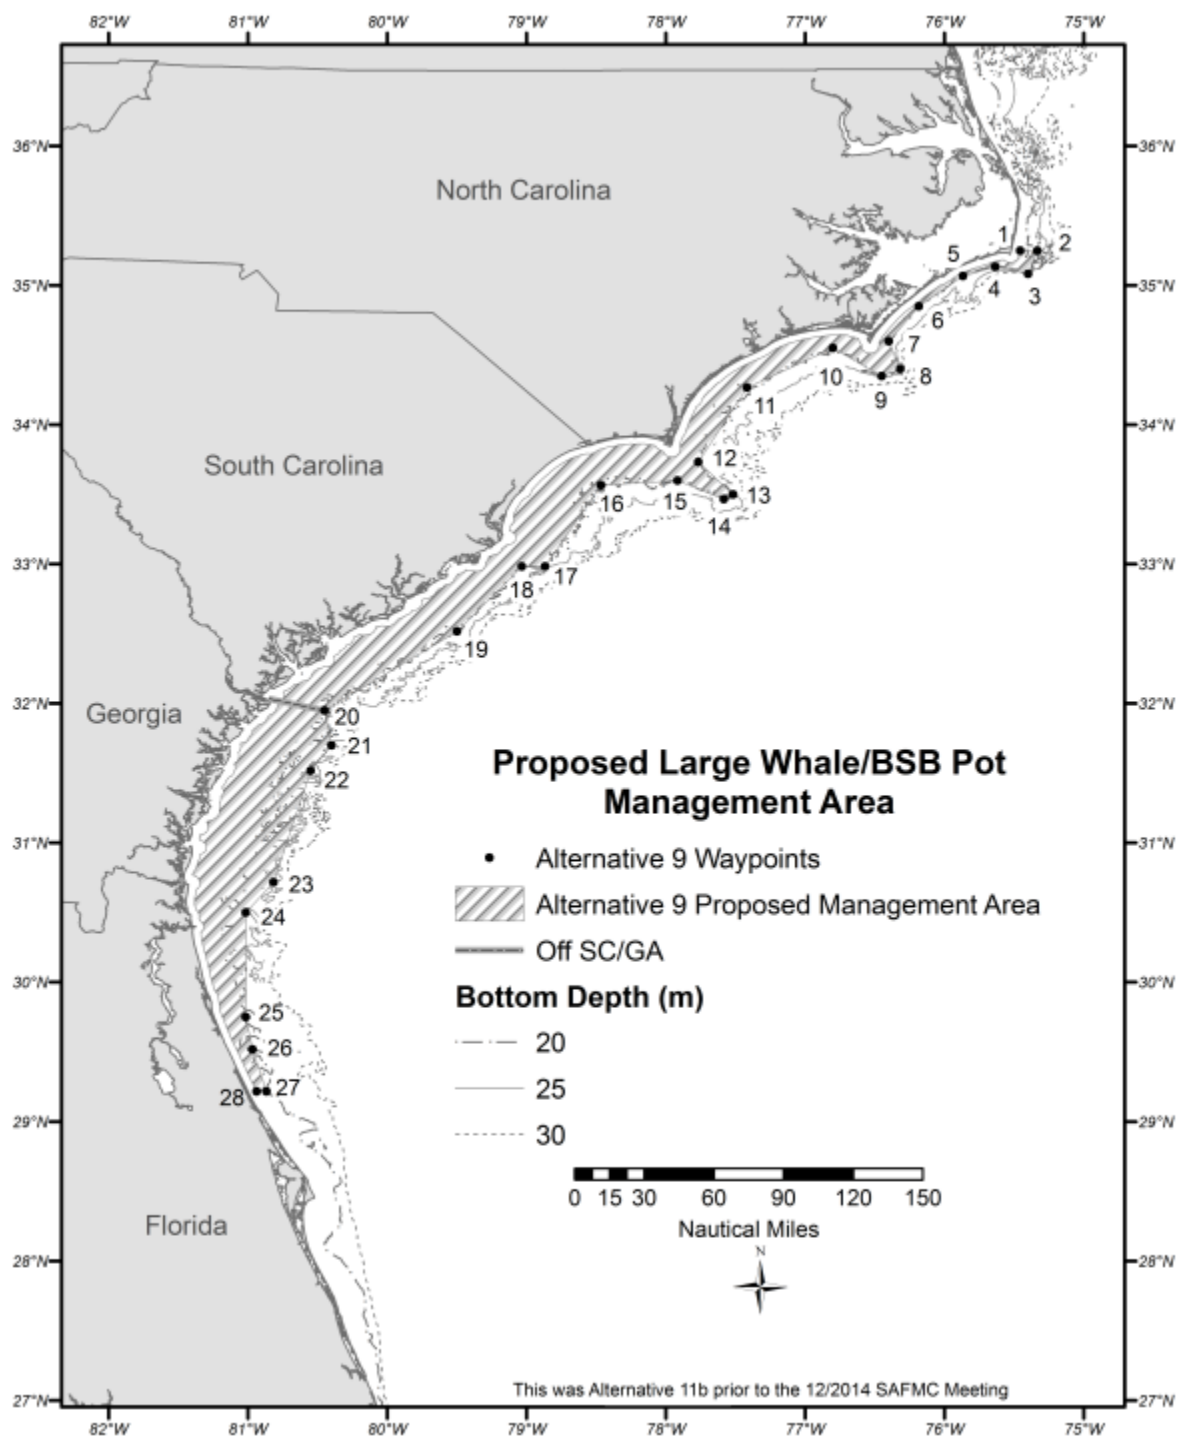

Figure S.A.9. Area for the proposed Black Sea Bass pot closure under alternative 9.

*Alternative 10.*—From November 1 to December 15, the Black Sea Bass pot closure applies to waters inshore of points 1–20 listed below (Table S.A.8), lying approximately between the Georgia–South Carolina state line and Cape Hatteras, North Carolina (Figure S.A.10).

From February 15 to April 30, the Black Sea Bass pot closure applies to waters inshore of points 1–28 listed in Table S.A.9, lying between the same two points (Figure S.A.11).

From December 16 to February 14, there would be no closure off of the Carolinas.

From November 15 to April 15, the Black Sea Bass pot closure applies to waters inshore of points 20–28 listed in Table S.A.8, lying approximately between the Georgia–South Carolina state line and Daytona Beach, Florida (Figure S.A.9).

In Alternative 10, the boundaries off Florida and Georgia are identical to the boundaries under alternative 5. Off North Carolina and South Carolina, the Black Sea Bass pot closure applies in the EEZ in waters shallower than 20 m from November 1 to December 15 and less than 25 m from February 15 to April 30.

Table S.A.8. Eastern boundary coordinates for the proposed Black Sea Bass pot closure under alternative 10 for November 1 to December 15.

| Point | North latitude | West longitude     | Point | North latitude | West longitude     |
|-------|----------------|--------------------|-------|----------------|--------------------|
| 1     | 35°15'         | State/EEZ boundary | 15    | 33°36'         | 77°55'             |
| 2     | 35°15'         | 75°20'             | 16    | 33°34'         | 78° 28'            |
| 3     | 35°05'         | 75°24'             | 17    | 32°59'         | 78°52'             |
| 4     | 35°08'         | 75°38'             | 18    | 32°59'         | 79°02'             |
| 5     | 35°04'         | 75°52'             | 19    | 32°31'         | 79°30'             |
| 6     | 34°51'         | 76°11'             | 20    | 31°57'         | 80°27'             |
| 7     | 34°36'         | 76°24'             | 21    | 31°42'         | 80°24'             |
| 8     | 34°24'         | 76°19'             | 22    | 31°31'         | 80°33'             |
| 9     | 34°21'         | 76°27'             | 23    | 30°43'         | 80°49'             |
| 10    | 34°33'         | 76°48'             | 24    | 30°30'         | 81°01'             |
| 11    | 34°16'         | 77°25'             | 25    | 29°45'         | 81°01'             |
| 12    | 33°44'         | 77°46'             | 26    | 29°31'         | 80°58'             |
| 13    | 33°30'         | 77°31'             | 27    | 29°13'         | 80°52'             |
| 14    | 33°28'         | 77°35'             | 28    | 29°13'         | State/EEZ boundary |

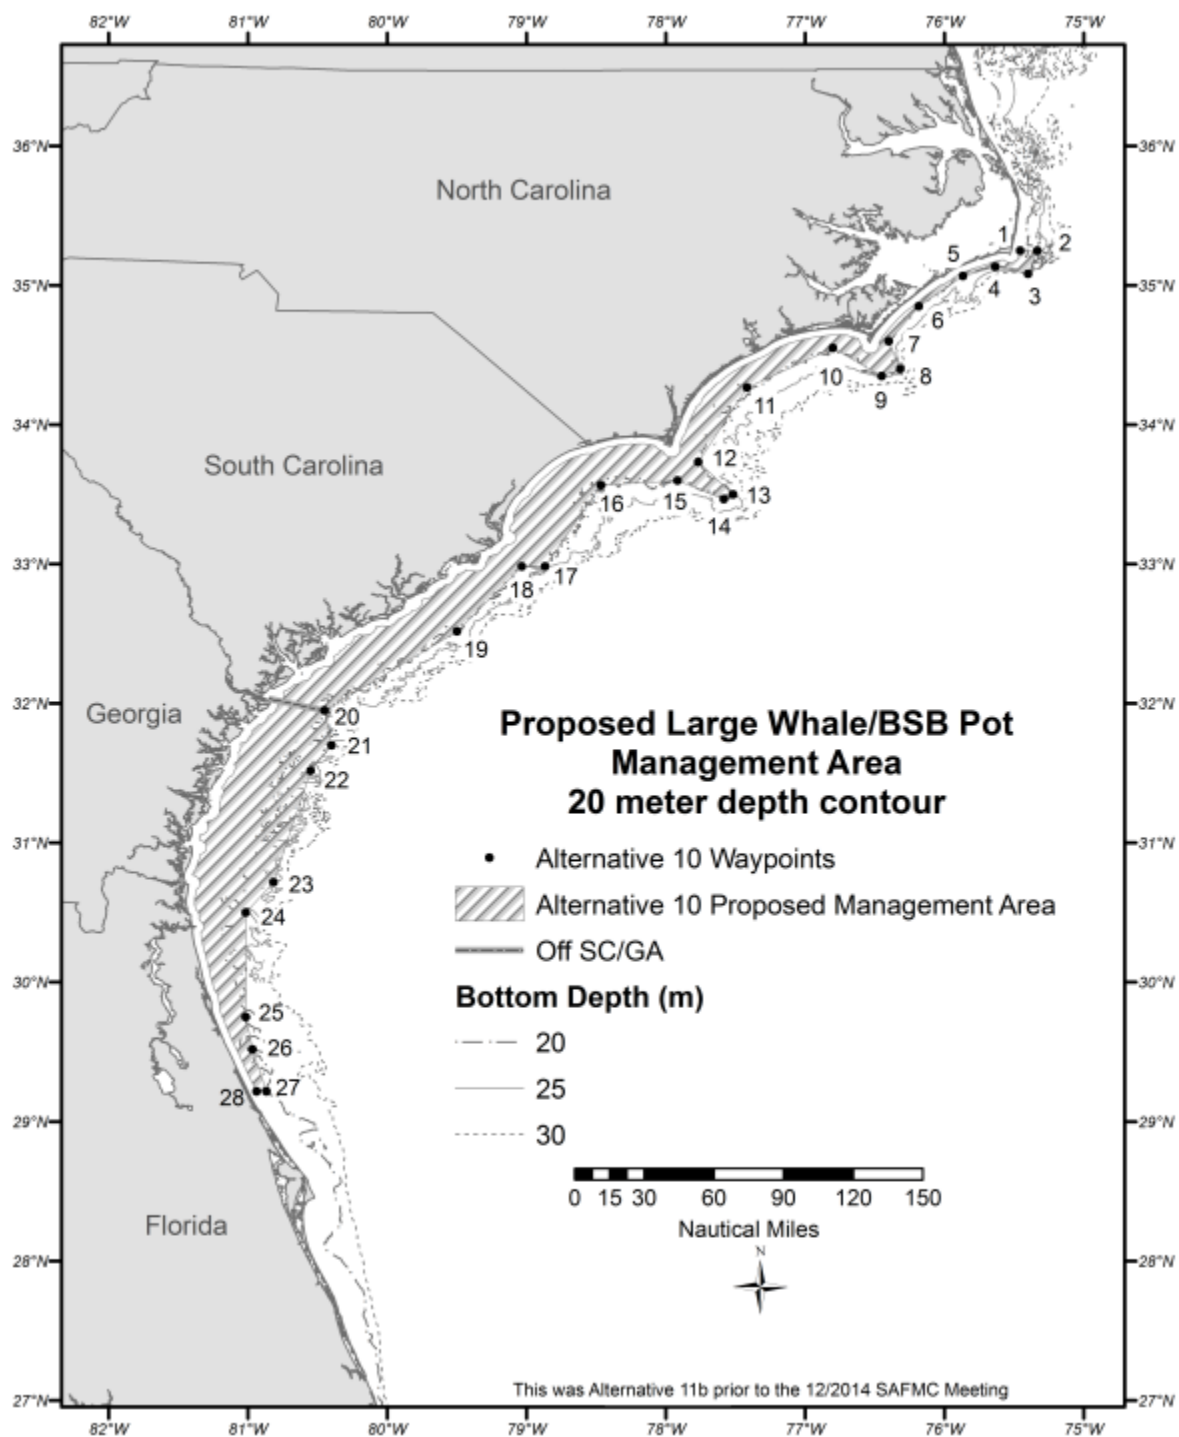

Figure S.A.10. Area for the proposed Black Sea Bass pot closure under alternative 10 from November 1 to December 15.

Table S.A.9. Eastern boundary coordinates for the proposed Black Sea Bass pot closure under alternative 10 for February 15 to April 30.

| Point | North latitude | West longitude     | Point | North latitude | West longitude     |
|-------|----------------|--------------------|-------|----------------|--------------------|
| 1     | 35°15′         | State/EEZ boundary | 19    | 33°06′         | 78°31′             |
| 2     | 35°15′         | 75°09′             | 20    | 33°05′         | 78°40′             |
| 3     | 35°06′         | 75°22′             | 21    | 33°01′         | 78°43′             |
| 4     | 35°06′         | 75°39′             | 22    | 32°56′         | 78°57′             |
| 5     | 35°01′         | 75°47′             | 23    | 32°44′         | 79°04′             |
| 6     | 34°54′         | 75°46′             | 24    | 32°42′         | 79°13′             |
| 7     | 34°52′         | 76°04′             | 25    | 32°34′         | 79°23′             |
| 8     | 34°33′         | 76°22′             | 26    | 32°25′         | 79° 25′            |
| 9     | 34°23′         | 76°18′             | 27    | 32°23′         | 79°37′             |
| 10    | 34°21′         | 76°27′             | 28    | 31°53′         | 80°09′             |
| 11    | 34°25′         | 76°51′             | 29    | 31° 31′        | 80°33′             |
| 12    | 34°09′         | 77°19′             | 30    | 30°43′         | 80°49′             |
| 13    | 33°44′         | 77°38′             | 31    | 30°30′         | 81°01′             |
| 14    | 33°25′         | 77°27′             | 32    | 29°45′         | 81°01′             |
| 15    | 33°22′         | 77°40′             | 33    | 29°31′         | 80°58′             |
| 16    | 33°28′         | 77°41′             | 34    | 29°13′         | 80°52′             |
| 17    | 33°32′         | 77°53′             | 35    | 29°13′         | State/EEZ boundary |
| 18    | 33°22′         | 78°26′             |       |                |                    |

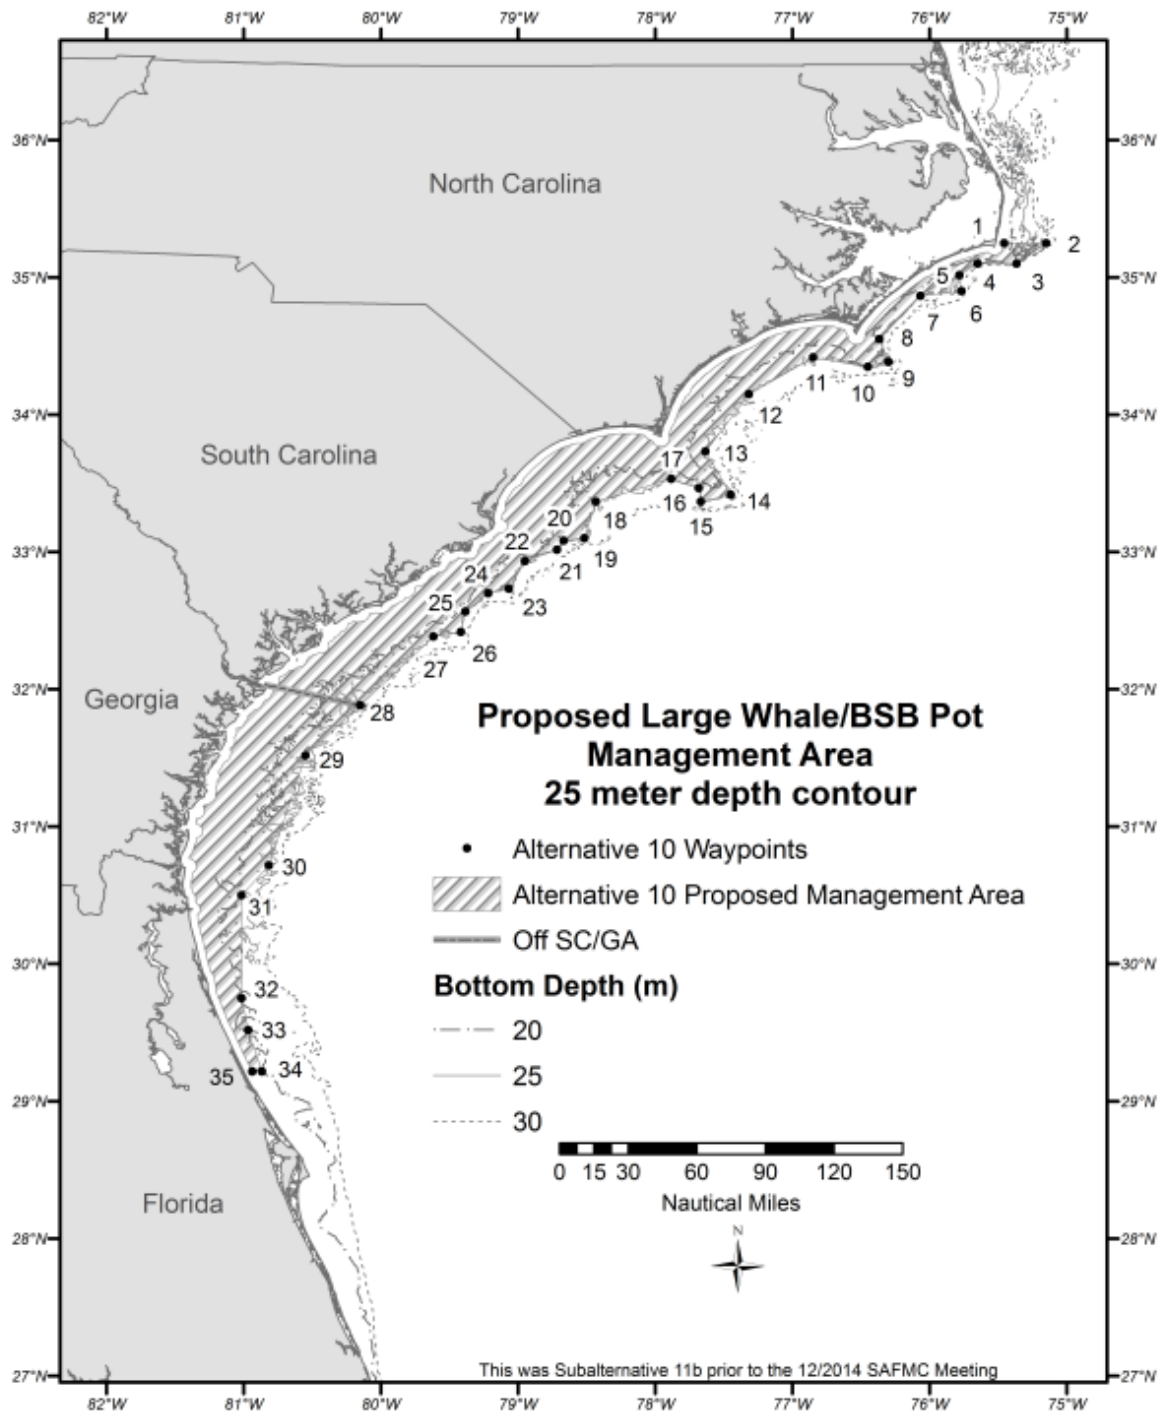

Figure S.A.11. Area for the proposed Black Sea Bass pot closure under alternative 10 from February 15 to April 30.

*Alternative 11 (preferred by SAFMC).*—From November 1 to 30 and from April 1 to 30 each year, the Black Sea Bass pot closure applies to waters inshore of points 1–35 listed in Table S.A.10, lying approximately between Daytona Beach, Florida, and Cape Hatteras, North Carolina (Figure S.A.12). From December 1 to March 31, the Black Sea Bass pot closure applies to waters inshore of points 1–28 listed in Table S.A.11, lying approximately between Cape Canaveral, Florida, and Cape Hatteras, North Carolina (Figure S.A.13).

From November 1 to 30 and from April 1 to 30 each year, the boundaries off Florida and Georgia are nearly identical to the boundaries under alternative 5. Off North Carolina and South Carolina, the Black Sea Bass pot closure applies in the EEZ in waters shallower than 25 m, corresponding to alternative 8.

From December 1 to March 31, this area generally represents waters 25 m or shallower from 28°21'N (approximately Cape Canaveral, Florida) to Savannah, Georgia; from the Georgia–South Carolina border to Cape Hatteras, North Carolina, the closure applies to waters under SAFMC management that are 30 m or shallower and corresponds to alternative 4. This bathymetric area is based on right whale sightings (all demographic segments) and sightings per unit of effort (a proxy for density) by depth and captures 97% and 96% of right whale sightings off the North Carolina–South Carolina area and the Florida–Georgia area, respectively.

Table S.A.10. Eastern boundary coordinates for the proposed Black Sea Bass pot closure from November 1 to 30 and April 1 to 30 under alternative 11.

| Point | North latitude | West longitude     | Point | North latitude | West longitude     |
|-------|----------------|--------------------|-------|----------------|--------------------|
| 1     | 35°15'         | State/EEZ boundary | 19    | 33°06'         | 78°31'             |
| 2     | 35°15'         | 75°09'             | 20    | 33°05'         | 78°40'             |
| 3     | 35°06'         | 75°22'             | 21    | 33°01'         | 78°43'             |
| 4     | 35°06'         | 75°39'             | 22    | 32°56'         | 78°57'             |
| 5     | 35°01'         | 75°47'             | 23    | 32°44'         | 79°04'             |
| 6     | 34°54'         | 75°46'             | 24    | 32°42'         | 79°13'             |
| 7     | 34°52'         | 76°04'             | 25    | 32°34'         | 79°23'             |
| 8     | 34°33'         | 76°22'             | 26    | 32°25'         | 79°25'             |
| 9     | 34°23'         | 76°18'             | 27    | 32°23'         | 79°37'             |
| 10    | 34°21'         | 76°27'             | 28    | 31°39'         | 80°27'             |
| 11    | 34°25'         | 76°51'             | 29    | 30°58'         | 80°47'             |
| 12    | 34°09'         | 77°19'             | 30    | 30°13'         | 81°01'             |
| 13    | 33°44'         | 77°38'             | 31    | 29°32'         | 80°39'             |
| 14    | 33°25'         | 77°27'             | 32    | 29°22'         | 80°44'             |
| 15    | 33°22'         | 77°40'             | 33    | 28°50'         | 80°22'             |
| 16    | 33°28'         | 77°41'             | 34    | 28°21'         | 80°18'             |
| 17    | 33°32'         | 77°53'             | 35    | 28°21'         | State/EEZ boundary |
| 18    | 33°22'         | 78°26'             |       |                |                    |

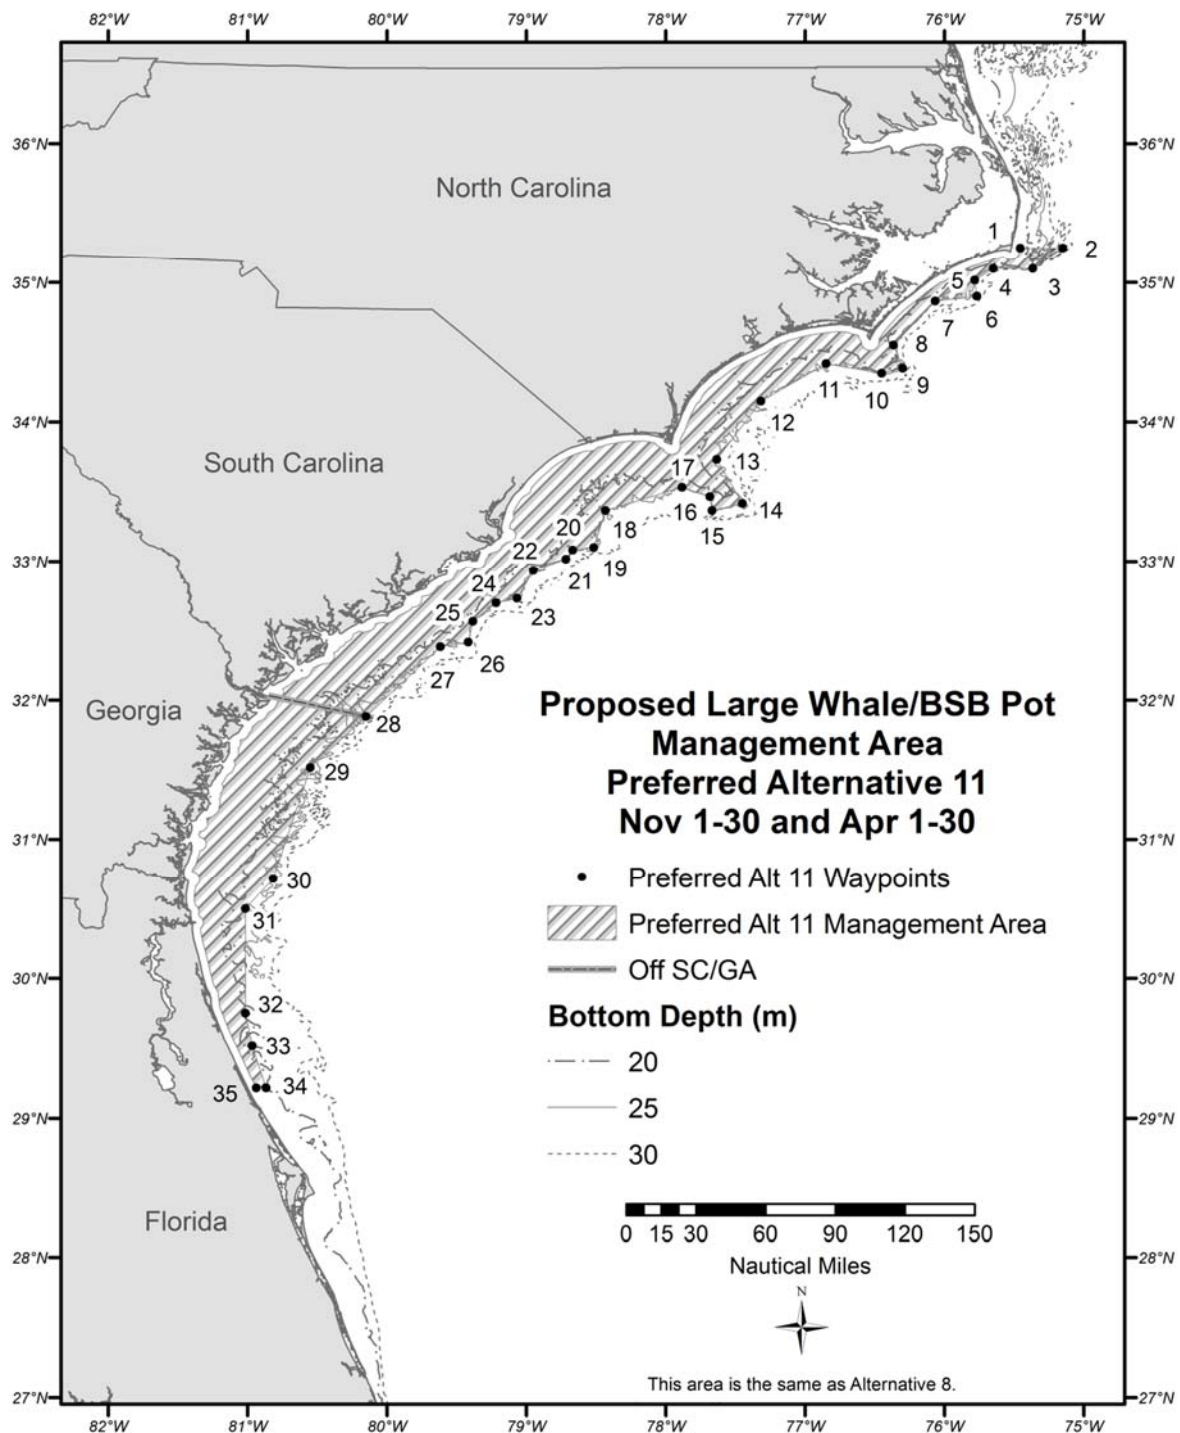

Figure S.A.12. Area for the proposed Black Sea Bass pot closure from November 1 to 30 and April 1 to 30 under alternative 11.

Table S.A.11. Eastern boundary coordinates for the proposed Black Sea Bass pot closure from December 1 to March 31 under alternative 11.

| Point | North latitude | West longitude     | Point | North latitude | West longitude     |
|-------|----------------|--------------------|-------|----------------|--------------------|
| 1     | 35°15′         | State/EEZ boundary | 15    | 33°01′         | 78°38′             |
| 2     | 35°15′         | 75°08′             | 16    | 32°40′         | 79°01′             |
| 3     | 34°58′         | 75°41′             | 17    | 32°36′         | 79°18′             |
| 4     | 34°49′         | 75°50′             | 18    | 32°19′         | 79°22′             |
| 5     | 34°47′         | 76°05′             | 19    | 32°16′         | 79°37′             |
| 6     | 34°31′         | 76°18′             | 20    | 32°03′         | 79°48′             |
| 7     | 34°20′         | 76°13′             | 21    | 31°39′         | 80°27′             |
| 8     | 34°12′         | 77°00′             | 22    | 30°58′         | 80°47′             |
| 9     | 33°43′         | 77°30′             | 23    | 30°13′         | 81°01′             |
| 10    | 33°21′         | 77°21′             | 24    | 29°32′         | 80°39′             |
| 11    | 33°18′         | 77°41′             | 25    | 29°22′         | 80°44′             |
| 12    | 33°22′         | 77°56′             | 26    | 28°50′         | 80°22′             |
| 13    | 33°12′         | 78°20′             | 27    | 28°21′         | 80°18′             |
| 14    | 33°05′         | 78°22′             | 28    | 28°21′         | State/EEZ boundary |

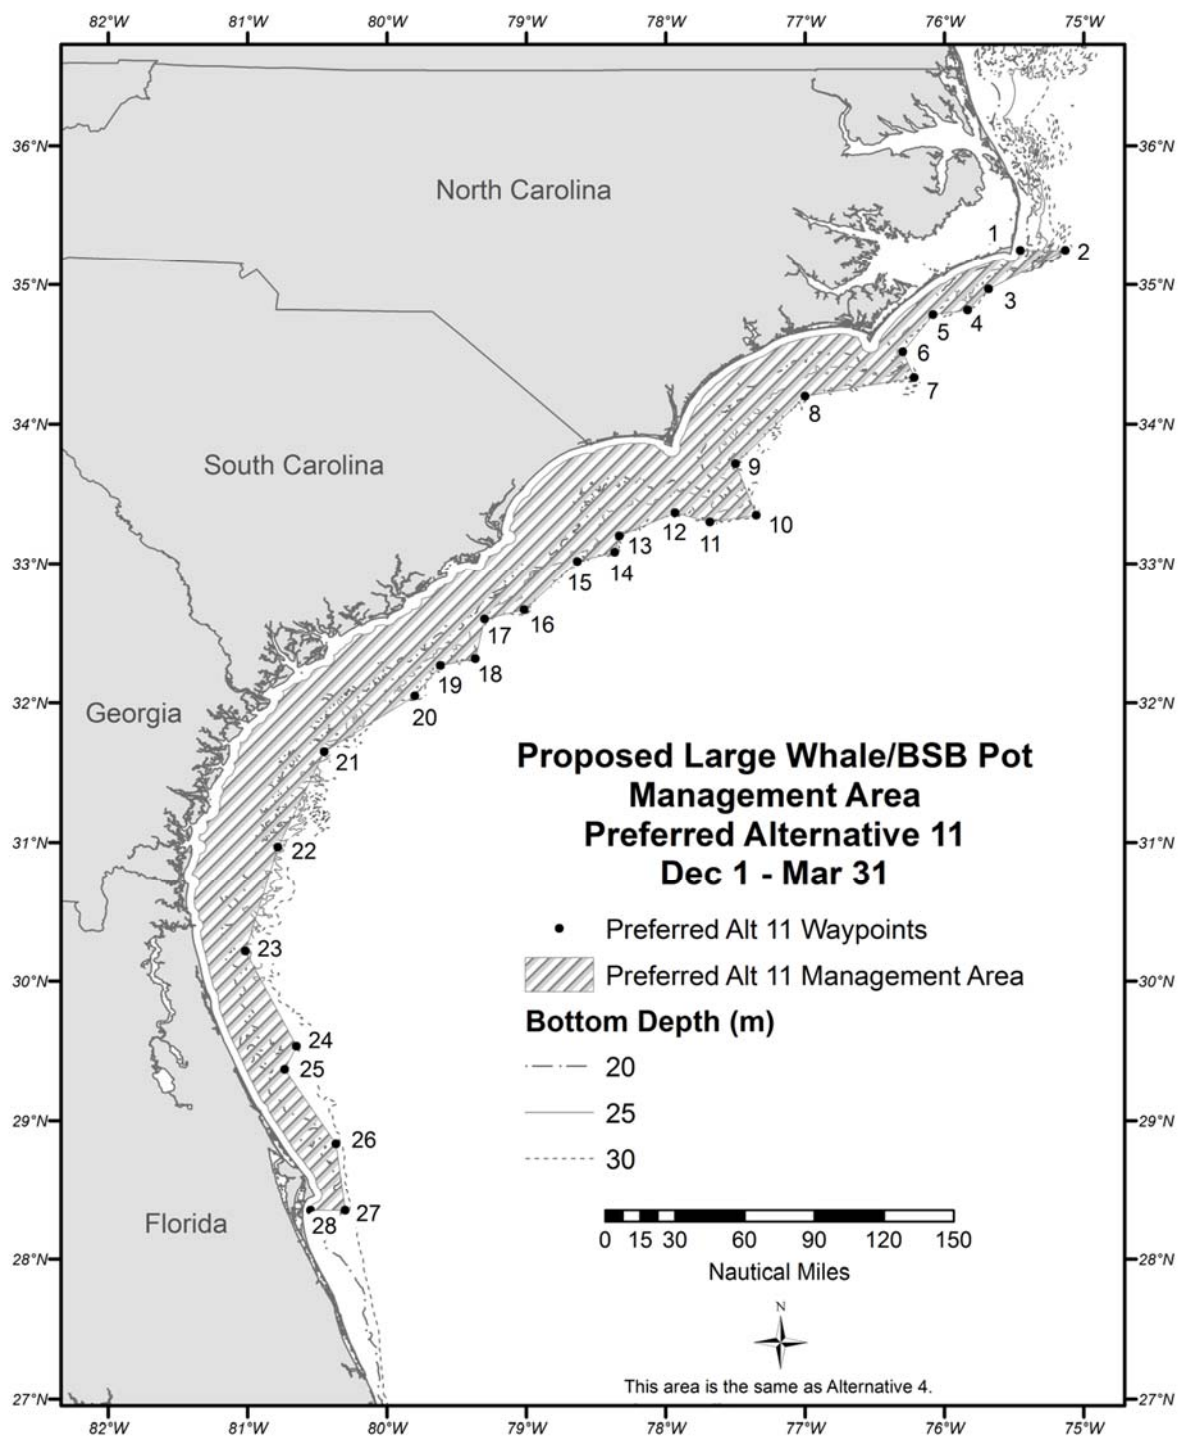

Figure S.A.13. Area for the proposed Black Sea Bass pot closure from December 1 to March 31 under alternative 11.

*Alternative 12.*—From November 1 to April 30, the Black Sea Bass pot closure applies to waters inshore of points 1–31 listed below (Table S.A.12), lying approximately between Cape Canaveral, Florida, and Cape Hatteras, North Carolina (Figure S.A.14).

This closure approximates the midpoints between alternative 4 and subalternative 8a.

Table S.A.12. Eastern boundary coordinates for the proposed Black Sea Bass pot closure under alternative 12.

| Point | North latitude | West longitude     | Point | North latitude | West longitude     |
|-------|----------------|--------------------|-------|----------------|--------------------|
| 1     | 35°15'         | State/EEZ boundary | 17    | 33°05'         | 78°26'             |
| 2     | 35°15'         | 75°09'             | 18    | 33°03'         | 78°39'             |
| 3     | 35°06'         | 75°22'             | 19    | 32°42'         | 79°03'             |
| 4     | 35°04'         | 75°38'             | 20    | 32°37'         | 79°18'             |
| 5     | 35°00'         | 75°44'             | 21    | 32°22'         | 79°23'             |
| 6     | 34°54'         | 75°46'             | 22    | 32°20'         | 79°36'             |
| 7     | 34°51'         | 75°50'             | 23    | 31°31'         | 80°32'             |
| 8     | 34°50'         | 76°04'             | 24    | 30°43'         | 80°49'             |
| 9     | 34°32'         | 76°20'             | 25    | 30°30'         | 80°58'             |
| 10    | 34°21'         | 76°15'             | 26    | 30°13'         | 81°01'             |
| 11    | 34°15'         | 77°04'             | 27    | 29°32'         | 80°49'             |
| 12    | 33°43'         | 77°34'             | 28    | 29°13'         | 80°46'             |
| 13    | 33°23'         | 77°24'             | 29    | 28°37'         | 80°20'             |
| 14    | 33°20'         | 77°41'             | 30    | 28°21'         | 80°18'             |
| 15    | 33°27'         | 77°54'             | 31    | 28°21'         | State/EEZ boundary |
| 16    | 33°17'         | 78°22'             |       |                |                    |

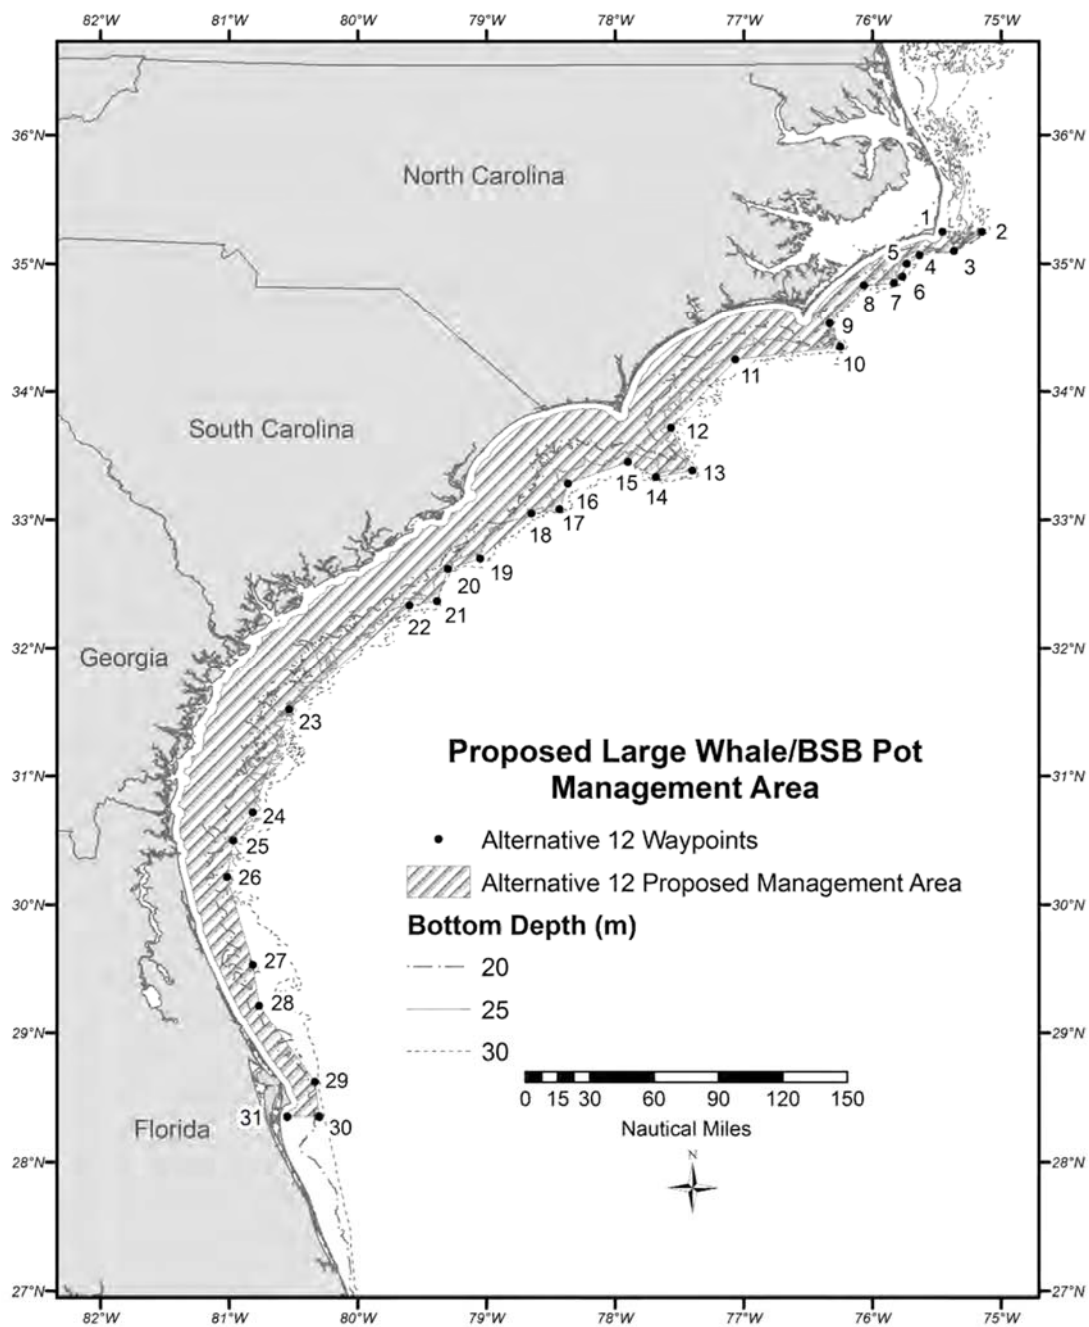

Figure S.A.14. Area for the proposed Black Sea Bass pot closure under alternative 12.

## SUPPLEMENTAL REFERENCES

- Garrison, L. 2007. Defining the North Atlantic right whale calving habitat in the Southeastern United States: an application of a habitat model. NOAA Technical Memorandum NMFS-SEFSC-553.
- Good, C. 2008. Spatial ecology of the North Atlantic right whale (*Eubalaena glacialis*). Doctoral dissertation. Duke University, Durham, North Carolina.
- Keller, C. A., L. Garrison, R. Baumstark, L. I. Ward-Geiger, and E. Hines. 2012. Application of a habitat model to define calving habitat of the North Atlantic right whale in the southeastern United States. *Endangered Species Research* 18:72–87.
- USOFR (U.S. Office of the Federal Register). 1994. Designated critical habitat: northern right whale. Code of Federal Regulations, Title 50, Part 226. U.S. Government Printing Office, Washington, D.C.
- USOFR (U.S. Office of the Federal Register). 2013. Notice of intent (NOI) to prepare a draft environmental impact statement (DEIS); request for comments. *Federal Register* 78:233(4 December 2013):72868–72869.
- USOFR (U.S. Office of the Federal Register). 2015. Designation of critical habitat for the North Atlantic right whale. *Federal Register* 80:34(20 February 2015):9313–9345.
- USOFR (U.S. Office of the Federal Register). 2016. Designation of critical habitat for the North Atlantic right whale. *Federal Register* 81:17(26 February 2016):4837–4874.
